# Supplementary material
Source: MDPI journal article supplement (https://www.mdpi.com/2072-4292/15/6/1503)
Supplement: s1 [file s1]

Archive with 3 entries (3 files):
- remotesensing-2124135-Supplemantary text.pdf
- Supplemantary Table S1 In situ measured lake-water quality parameters - ╕▒▒╛.xlsx
- Supplemantary Table S2 Inversion of Chl-a concentration.xlsx
