# Supplementary material
Source: MDPI journal article supplement (https://www.mdpi.com/2072-4292/15/6/1503)
Supplement: s1 [file s1 › Supplemantary Table S1 In situ measured lake-water quality parameters - ╕▒▒╛.xlsx]

## Sheet: Sheet1
Lake Name	date	longitude (°E)	latitude (°N)	Altitude (m)	Area (km²)	Chlorophyll-a (µg/L)	BGA (µg/L)	Turbidity (FNU)	pH	DO (mg/L)	fDOM (QSU)	TSS	ISS	OSS	CDOM
Puma Yumco	2009-06-29	90.428	28.552	5019	292.3				9.2	10.9
Bong Co	2009-09-01	91.183	31.214	4679	143.3				9.2	10.5
Zhari Namco	2009-09-17	85.717	30.902	4626	1002				10.3	10.3
Paiku Lake	2010-07-06	85.6	28.875	4590	271.5				9.1	8.2
Songmuxi Co	2012-07-30	80.233	34.588	5036	30	1.6			8.5	5.8
Zongxiong Co	2012-08-03	80.161	33.103	4324	6.4	1.6			9.3	6.4
Cuoga	2012-08-03	80.315	33.094	4350	8.1	2.5			9.4	5.7
A'ong Co	2012-08-05	81.759	32.753	4396	68	0.7			9.2	4.9
Dibu Co	2012-08-12	84.824	30.79	4614	64.8	1.2			9.6	5.6
Qige Co	2012-08-13	85.517	31.196	4667	18.7	2.1			10.5	7
Caiji Co	2012-08-13	85.444	31.205	4638	33.3	4.6			9.1	5.9
Zhangnai Co	2012-08-17	87.412	31.551	4580	40	0.6			9.6	5.5
Freshwater Lake	2012-10-22	88.752	33.436	4970	115.3				8.8	6.1
Longwe Lake	2012-10-25	88.313	33.86	4948	58.1	0.3			8.5	5.5
Yueya Lake	2012-10-27	88.385	34.383	4935	11.8				8.8	8.9
Bandao Lake	2012-10-27	88.402	34.149	4930	49				7.5	6.1
Liangxi Lake	2012-10-28	88.466	34.606	4840	2				8.5	9.1
Hengliang Lake	2012-10-29	89.027	34.895	4890	25				8.9	10.4
Yongbo Lake	2012-10-30	89.198	34.942	4850	43				8.4	2.8
Dogaicorng Qangco	2012-11-08	89.285	35.314	4792	396.7	1			8.8	5.6
Xuru Co	2013-09-20	86.421	30.306	4717	209.2	1	1.4	1.2	9.1	5.9
Wuzhi Lake	2013-10-21	85.118	33.742	4922	15.4				9.4	7.3
Daxiong Lake	2013-10-26	85.599	34.058	4893	43.5	0.6	0.2	15.5	9.2	6.8
Burog Co	2013-10-29	85.719	34.347	5170	93	0.1	0.1	0.7	9.3	6.3
Xueyuan Lake	2013-11-02	85.71	34.291	5218	27.9	0.1	0.1	2.1	9.3	7.2
Laxiong Co	2013-11-03	85.209	34.35	4900	68.7	0.2	0.1	0.6	9.6	5.8
Siling Co	2014-08-07	88.975	31.753	4544	2419	3.4	0.5	1.3	9.4	6
Taruo Lake	2014-09-04	84.137	31.14	4572	484.5	3.7	1	2.3	8.7	7.3
Bangda Lake	2015-09-05	81.53	34.958	4926	148.2	3.5	0.8	3.2	8.5	5.1
Changna Lake	2015-09-07	81.257	34.804	5026	6.5				9.7	7.7
Longmu Lake	2015-09-10	80.473	34.624	4980	105.9	3.8	1	1.3	8	2.8
Matou Lake	2015-09-13	80.897	34.626	5215	9.3	3.3	0.5	0.8	8.7	6.7
Hongshan Hu	2015-09-14	80.062	34.827	5063	6.3	4	1.3	29	9.2	6.6
Mang Co	2015-09-14	80.447	34.509	5027	13.1	3.5	1.2	4.2	8.3	4.8
Aksai Chin Lake	2015-09-17	79.794	35.246	4849	278.1	4.8	0.6	4.6	8.6	4.2
Quanshui Lake	2015-09-18	80.152	34.75	5122	18.7	5	2	1.6	9.4	6.7
Gozha Co	2015-09-25	81.06	35.022	5086	247.8	3.3	0.5	0.3	9.1	7.5
Chang Lake	2015-09-26	80.643	34.652	5115	10.5		0.6	9.5	8.9	6.5
Wuming Lake	2015-09-26	80.637	34.646	5100	0.04	3.4	0.5	0.5	8.7	6.9
Xinxing Lake	2015-09-26	80.752	34.786	5011	13.7	6.6	1.5		8.3	5.6
Nam Co	2016-06-25	90.776	30.768	4718	2020.7	3.3	0.5	0.1	9.5	11.4
Dorsoidong Co	2016-10-24	89.834	33.349	4935	494.3	3.4	0.5	0.1	9.1	6.8
Chibzhang Co	2016-10-31	90.232	33.381	4941	566.9	3.4	0.5	5.1	9.1	6.8
Dan Lake	2016-11-03	89.416	33.223	4919	0.15					7.4
Khongnam Tso	2016-11-03	89.731	33.139	4894	29.7					7.1
Bandong Lake	2016-11-03	89.362	33.163	4935	3.1					7.8
Xiaodao Lake	2016-11-03	89.465	33.206	4925	7.9					4.5
Dogai Coring	2016-11-07	88.979	34.553	4823	529.2	3.3	0.5	2.1	8.2
Deru Co	2016-11-09	88.912	32.671	4874	10.7	3.8	1		10						1.45212
Cuolongjiao	2016-11-09	88.851	32.8	4885	3.3	3.7	0.8	5	10.4
Tso Ngon	2017-06-24	88.762	31.622	4561	271.5	3.5	0.5	1.2	9.5	6.5
Dagze Lake	2017-06-27	87.538	31.861	4470	314.4	0.5	0.7	5	10	5.6	0.3	8.5	6.1	2.4
Ga'a Co	2017-07-01	88.958	32.198	4620	13	0.2	0.1	4.4	9.7	6	6.6	1.49	0.9	0.59
Gyaring Co	2017-07-02	88.485	31.015	4650	473.3	3.5	0.5	2.5	9.2	6.3
Guogen Co	2017-07-02	89.192	32.4	4675	57.8	1.7	1.1		9.9	6.4	1.1
Baosai'er Co	2017-07-02	89.432	32.335	4593	33.2	0.5	1.1	4.3	9.8	5.6	1.4	3	1.95455	1.04545
Zigetang Co	2017-07-04	90.851	32.046	4573	239.7	0.8	1.5	1.4	10.1	5.8	0.1	3.78125	2.90625	0.875
Daru Co	2017-07-09	90.738	31.669	4688	68.3	0.1	0.1	7.7	9.3	6.1	3.3	4.7	2.8	1.9
Jiang Co	2017-07-10	90.84	31.528	4603	40.2	1.1	1.9	2.4	9	5.9	0.1	4	2.6	1.5
Kunggyu Co	2017-08-26	82.115	30.632	4795	55.2	0.5	0.6	3.3	9.8	6.1	1.8	5.73333	3	2.73333
Bangong Lake	2017-08-30	79.809	33.551	4243	500.1	0.5	1.4	1.5	9.5	6.4	0.1	1.25	0.55	0.7
Ang Laren Lake	2017-08-30	83.038	31.573	4721	535.1	3.5	0.5	0.4	10	5.5		7.05	6	1.05
Rengqingxiubu Lake	2017-09-01	83.465	31.277	4765	187.5	3.8	0.8	6.1	10.4	6		2.55102	1.58163	0.969388
Rebang Co	2017-09-01	80.527	33.04	4326	48	0.1	0.1	3.2	9.5	4.8	0.3
Lake Manasarovar	2017-09-04	81.444	30.635	4590	412	3.6	0.8	0.1	9.6	6
Lake Rakshastal	2017-09-08	81.252	30.669	4575	258.9	3.4	0.5	0.5	9.8	6.4
Lang Co	2018-09-01	87.377	29.212	4275	8.6	2	0.5	17.5	9.2	9.3					0.37608
Angrenjin Co	2018-09-01	87.192	29.303	4285	20.5	12.5	2.1		9.5	9.3					3.813
Ngangze Co	2018-09-04	87.129	31.03	4699	465.4	1.8	0.2	3.8	10	10.6	12
Ma'erxia Co	2018-09-06	87.553	30.954	4672	99.9	16.5	1.1	32	9.5	12.8	13.9	31.9	22.8	9.2
Dongbu Co	2018-09-06	87.211	31.278	4651	38.2	2.8	1.3		9.7	5.3	0.6
Gemang Co	2018-09-07	87.276	31.586	4577	66	0.3	0.2	2.4	9.9	9.9	0.5	4.63918	2.8866	1.75258	0.360496
Tangra Yumco	2018-09-08	86.638	31.263	4536	858.3	1	1.1	13.3	9.3	10	3.5
Dangqiong Co	2018-09-08	86.798	31.561	4469	64.7	3	1.5	3.3	9.3	6	3.8				0.517561
Bingni	2018-09-09	86.314	30.614	4683	70	0.1	0.1	1.1	10.3	10.6	0.3	2.4	1.3	1.1	0.241969
Mucuo	2018-09-09	86.233	30.663	4683	80	0.1	0.2	0.1	9.5	10.3	0.1	8.84615	6.15385	2.69231	0.287414
Garen Co	2018-09-12	84.979	30.787	4662	62.8	2.8	1.5	9.8	9.6	9.9	1.8				0.593406
Dawa Lake	2018-09-13	84.959	31.266	4612	119.7	1.8	1.5	1.5	9.1	9.4	1	12.2353	10.7647	1.47059	0.36065
Tong Tso	2018-09-14	84.765	32.162	4367	104.7	1.1	1.4	5.5	9.1	9.1	1.9	20.4211	19.0526	1.36842
Cam Co	2018-09-15	83.554	32.11	4314	100	0.3	0.5	3.2	8.3	6.2	1.5	36.75	33.6	3.15	0.319273
Lagkor Co	2018-09-16	84.139	32.038	4452	97	1.2	0.7	0.4	9	8.1	0.4	48.8	45.2	3.6
Darao Co	2018-09-17	83.212	32.475	4397	36.6	1	2.2	2.1	9.8	10.4	2.1	2.30303	1.09091	1.21212	0.530151
Wuma Co	2018-09-17	83.177	32.438	4421	36.6	2.3	2.7	\	9.3	10.2	6.9				1.5447
Bero Zeco	2018-09-17	82.959	32.438	4407	36.3	2.8	1.4	15.3	9.1	10.1	0.7				0.739263
Jieze Caka	2018-09-19	80.881	33.942	4496	114.8	1.4	1.1	4	9	3.3	0.1	32.72	31.8	0.92	0.274287
Lumajangdong Co	2018-09-21	81.677	34.013	4817	392.2	2	1.1	0.3	9.6	5.7	0.4	24.5455	18	6.54545	0.229532
Dajiamang Co	2018-09-26	85.724	29.669	5039	9.5	2.2	1.1	4.1		6.4	0.3				0.0978775
Dajia Lake	2018-09-26	85.731	29.813	5125	108.2	0.5	0.3	0.2	9.5	5.9	1.4	1.9	1.1	0.8	0.342456
Co Ngoin	2018-10-27	91.513	31.492	4528	82.3	2.1	0.9	8.4	8.9	7.5	9	11.9403	6.56716	5.37313	0.742564
Neri Pumco	2018-10-28	91.479	31.304	4501	92.5	1.3	0.5	1.2	9.4	7.1	10.8	4.6	2.15	2.45	1.12049
Cona	2018-10-31	91.505	32.047	4550	186.4	0.6	0.5	2.3	8.6	6.8	2.6	1.7	1.05	0.65
Dung Co	2018-11-03	91.167	31.673	4520	150.3	5	0.9	2.5	9	6.4	7.8	9.95	6.55	3.4	0.6681
Pung Co	2018-11-08	90.933	31.502	4534	176.9	3.4	0.6	1	8.6	6.7	3.1	10.1	7.6	2.5	0.411009
Bam Co	2018-11-09	90.618	31.264	4584	248.4	3.4	2.3	7.7	8.6	2	0.9	3.7	2.4	1.3
Mudidalayu Co	2019-07-05	88.609	30.579	4807	23.9	4.4	1	5.8	9	6.1	6.4
Yoqag Co	2019-07-05	88.624	30.476	4812	66	0.8	0.2	0.2	8.8	5.9	3.1
Mugqu Co	2019-07-06	89.013	31.039	4680	76.9	0.3	1.2	0.2	9.3	5.2	5.2
Gomang Co	2019-07-07	89.204	31.209	4634	115.5	0.3	0.1	0.3	9.9	5.9	1.2
Lake Jargö	2019-07-08	88.221	31.821	4558	88.5	0.3	0.7	0.1	9.6	6.3	0.5
Urru Co	2019-07-10	87.933	31.712	4559	343.6	0.1	0.7	0.1	9.6	6	0.5
Serbug Co	2019-07-12	88.229	32.005	4520	92.4	1.4	0.1	12.1	9.6	5.2	7
Gyarab Punco	2019-07-13	87.802	32.157	4655	50.1				10.2	5.3	2.5
Norma Co	2019-07-13	88.064	32.398	4705	95.7	0.6	0.2	4.2	10.1	5.7	2.8
Kyebxang Co	2019-07-16	89.95	32.453	4620	187.4	0.9	0.6	0.5	10.2	5	3
Yamdrok Lake	2019-07-23	90.867	28.948	4447	570.1	0.1	0	0.2	9.3	5.9	0.9
Zhen Co	2019-07-25	90.53	28.972	4436	38.7	1.2	0.9	3.8	8.9	6.1	0.5
Telashi Lake	2019-10-17	92.242	34.808	4810	53.9	0.5	1.2	53.8		8.6	1
Wulanwula Lake	2019-10-25	90.67	34.766	4858	654	1.2	2	11.7		9.7	0.1
Xijir Ulan Lake	2019-11-01	90.326	35.205	4784	563.7	0.7	0.5	2.6		6.5
Lexie Wudan Lake	2019-11-03	90.201	35.744	4872	275.2	1.9	1	2.1		7
Taiyang Lake	2019-11-05	90.608	35.896	4885	101.7	1.1	0.6	1.2		10.4
Hoh Xil Lake	2019-11-09	91.236	35.575	4904	354.3	0.7	1.8	1.7		11.1
Salt Lake	2019-11-17	93.425	35.498	4425	149.5	0.9	0.6	0.9		9.4
Beileicuo	2020-08-12	88.413	32.934	4827	22.1	2	2.3	13	9.2	5.3	1.3
Yagain Co	2020-08-13	89.795	33.044	4837	158.7	1.2	0.4	1.5	8.8	4.5	0.4
Yahu Lake	2020-08-14	89.069	33.175	4808	75.4	0.7	0.4	6.7	8.8	5.4	0.3
Angda'er Co	2020-08-15	89.571	32.699	4804	66.5	1	0.4	6.1	9.5	4.6	0.4
Pongyin Co	2020-08-16	88.208	32.896	4639	75.4	1.7	1	2.2	9.2	4.2	0.3
Baidoi Co	2020-08-17	87.823	32.793	4722	83.3	1.3	1.2	6.4	9.6	5.9	0.6
Yibug Caka	2020-08-18	86.709	32.97	4522	174.6	1.6	0.3	8.2	8.6	3.9	0.7
Lake Ayakum	2020-09-13	89.479	37.546	3836	1001.7	0.3	0.4	0.7	8.5	4.7	0.4
Lake Aqqikkol	2020-09-22	88.408	37.093	4216	553.5	0.8	0.8	2.4	9	5.8	0.1
Jingyu Lake	2020-09-29	89.431	36.331	4673	341.7	0.4	0.4	1.5	8.9	6.2	0.1
Zhuonai Lake	2020-10-07	91.939	35.558	4693	116.6	0.7	0.6	9.1	9	7.2	0.7
