# Supplementary material
Source: MDPI journal article supplement (https://www.mdpi.com/2072-4292/15/6/1503)
Supplement: s1 [file s1 › Supplemantary Table S2 Inversion of Chl-a concentration.xlsx]

## Sheet: Sheet1
	Y	X	1986	1987	1988	1989	1990	1991	1992	1993	1994	1995	1996	1997	1998	1999	2000	2001	2002	2003	2004	2005	2006	2007	2008	2009	2010	2011	2013	2014	2015	2016	2017	2018	2019	2020	2021
Qinghai Lake	36.89	100.2	3.96703	4.18923	4.6116	3.83703	4.45893	5.2657	9.7827	3.4986	3.78985	5.58393	4.68843	4.07375	5.16203	4.89723	5.26563	3.9809	4.52247	4.4304	4.1959	3.60393	3.67164	7.38825	4.31084	4.11964	4.977	7.39837	3.3164	3.8434	3.78932	3.81645	3.83892	3.75463	3.82077	3.54973	3.7613
Serlin co	31.8	88.99			5.25138	0.4455		5.62875	4.5758	4.35902	3.36108	4.66228	9.14134	2.19417	1.84673					4.61195	1.87205	2.16127	7.07708	3.02295	2.27355	4.5825	4.50028	5.939	3.58187	2.94768	2.08173	3.7101	3.31057	3.21123	3.14127	2.80735	2.53326
Nam Co	30.74	90.6			4.22393	2.1213	3.96962	4.45723	2.52543	1.2419	1.50878	2.22022	0.1999		0.34835		4.68503			1.318	1.70338	6.12566	1.02915	3.04557	6.0789	1.93542	6.60536	5.16983	3.0832	2.7591	3.37298	2.24508	3.62684	2.94688	2.20558	2.84546	2.81787
Dorsoidong Co	33.43	90.07	4.32212	3.14068	1.42786	2.75704	1.27933	2.48317	3.70157	4.87207	2.38006	1.7694	2.4808		4.53853			0.429733	6.16694	1.7157	4.7296	3.64192	1.52145	1.7285	1.76323	4.44223	6.03104	0.8152	0.5023	2.8337	1.84932	2.37614	2.84622	3.17364	2.38682	2.82488	2.71732
Lake Ayakum	37.53	89.45	3.8587	2.2562	1.53465	1.5053	1.23593	4.92037	4.57833	5.84033	2.33284	5.56337	4.33498	2.81047	8.04097	6.72244	4.65435	3.56348	6.3496	2.13266	1.97053	1.43045	4.8855	2.6299	7.25348	5.42048	5.70928	6.0731	2.31496	3.52033	3.55063	4.14835	2.41388	1.85348	2.46736	1.8484	1.85128
Tangra Yumco	31.07	86.61			2.00164	2.9996		7.38704	7.37008	6.5111	2.7191	4.0939	2.71008	6.5297	5.94813	4.8866	2.8541	4.26126		0.7277	2.94394	2.34963	2.56954	2.4649	3.0747	3.62224	1.6558	3.36433	2.66482	2.24424	2.47168	2.57036	2.38144	3.19788	2.56662	2.3478	2.51154
Wulanwula Lake	34.8	90.48		6.46487	1.4634	2.37367	3.7954	2.9156	4.96918	2.4472	2.2148	2.60618	3.70637	3.26816	2.76243	3.43983	3.72875	1.31877	9.353	0.885425	0.830667	1.76898	4.81343	1.71333	1.9085	1.24923	1.65657	3.39475	1.5719	1.8521	0.618233	1.88812	2.41698	2.10166	1.2905	2.18852	2.376
Xijir Ulan Lake	35.22	90.28		1.48896	1.82358	1.70824	1.40288	1.54748	1.2337	1.60714	1.9448	1.38108	1.6394		1.94638	1.16332	12.7137	0.6637	1.37332	1.37464	1.22816	1.46	1.3602	1.52792	1.4349	1.55065	1.53626	1.5824	1.6879	1.56452	1.35422	1.87844	1.78128	1.54638	1.34082	1.50888	1.57514
Yamdrok Lake	28.96	90.71			2.72142	2.37002	2.12164	4.3006	3.1232	7.063	2.02812	1.63236	1.6522	6.12277	2.75043	2.89963	3.40204	8.5906		4.17138	6.74975	3.67624	8.36286	3.58654	3.77402	2.07578	4.68276	1.9519	2.58508	2.74884		2.97086	2.95072	3.117	2.96414	2.48862
Lake Aqqikkol	37.08	88.4		6.5502	4.10208	3.30504	3.1467	7.43706	4.09205	7.47848	4.97064	6.68068	3.56322	5.59384	4.76735	8.36936	5.47388	7.68412	4.989	5.41304	2.44602	6.87574	3.24534	5.0286	3.5804	5.58727	5.51616	7.49662	3.40768	2.50086	2.06578	2.01086	3.506	2.5108	1.53752	3.22222	2.65248
Ang Laren Lake	31.54	83.08							1.97943	2.10418	2.3529	4.94692	1.77133	3.877	0.45035									2.91033	4.47445	1.36284	0.47	1.88315	2.94136	2.49834	2.24108	2.08082	2.29746	2.65338	2.10988	1.8237	2.17392
Dogai Coring	34.58	88.96	2.48123	2.73493	4.98574	1.6155	1.9256	5.40982	7.2589	1.8767	2.2742	2.2629	3.092		4.76668	1.644	2.0568	1.61552	1.69378	4.28755	2.52947	1.602	1.866	1.0293	1.1548	1.7448	2.1061	1.6267	1.97634	2.01152	1.40804	2.0501	2.45118	2.5695	2.22214	1.62608	1.59412
Taruo Lake	31.14	84.12			2.4378	1.97436		5.66868	5.14755	5.3478	3.56292	1.6021	1.57923	3.781	2.18625	3.36857		4.0199		5.86627	3.4978	2.54336	2.34052	2.4157	1.00427	3.49725	1.39256	6.30855	1.19704	3.0657	3.8912	3.03546	3.04862	3.2635	3.09886	3.27682	2.97296
Angzi co	31.02	87.13			2.478	2.21425	2.00678	4.02644	4.5055	1.11012	1.73727	2.2235	2.35222	1.81368	2.91605	3.86565	3.3273	11.7563			3.0232	3.18512	6.65337	7.15542	2.00073	3.2392	3.48688	1.89403	3.50944	3.10542	2.94268	3.5983	3.25176	3.31363	2.09658	2.57868	2.81792
Mapangyo Co	30.69	81.38							8.7997	8.42314	2.80482	5.83866	7.2629		7.59138	8.35838								4.52296	5.59728	9.38474	7.32838	4.17814	3.19896	3.9273	3.53934	1.27246	3.9519	0.57324	1.2781	2.70288	0.782967
Dogaicorng Qangco	35.32	89.24	1.5425	12.7137	4.72712	1.39143	2.27142	3.38032	5.64805	1.61015	7.82878	2.0957	2.56896	1.83736	0.6618	2.68686	9.63227	1.12756	2.57005	1.7139	1.99265	2.32307	1.04233	1.333	0.9411	1.6063	1.6553	1.5253	1.77554	1.37968	1.34892	1.8437	1.52258	1.61556	1.64126	1.52406	1.425
Lumajangdong Co	34.02	81.61							4.1658	5.88644	2.1566	4.31925	5.12224	6.37508	1.27405		4.87858	7.09615						1.9108	6.94154	3.95827	4.77158	3.29502	3.22674	2.89055	3.27937	1.64986	3.01037	2.96133	3.45198	2.39634	2.36046
Kekexili lake	35.59	91.14	2.7611	11.7202	3.41192	2.2145	1.54014	3.64653	3.65315	3.51934	3.10432	2.0402	5.13828	1.78	2.1505	1.58764	2.34754	1.98098	4.99316	3.52024	1.71483	2.1894	2.60352	2.06896	1.4829	1.77837	3.87942	4.23384	2.0412	1.92366	3.13438	3.07526	2.77964	2.42602	2.62268	2.99746	2.88714
Jingyu Lake	36.33	89.44		5.88746		5.27013		7.20194	3.61017	6.98764	1.1351	8.55452	7.3058	3.35828	5.5432	6.0747	2.78797	5.95863	3.31493	1.25623	1.3872	4.54537	2.32065	2.1023	7.2893	6.82395	2.7895	3.20858	2.36802	2.59034	2.74094	2.59322	2.16302	2.01138	1.86692	2.78236	2.74906
Kusai Lake	35.73	92.87	2.18083	1.0414	2.30113	1.31448	0.756367	9.98573	2.93575	1.73805	1.08288	1.5151	1.14105	1.38325	0.39245	0.1341	1.1812	0.62465	1.6731	0.927925	1.5314	1.9876	5.8049	1.4412	1.60863	0.7345	1.654	2.61092	1.4595	1.1136	1.95046	2.0679	2.16416	2.72096	1.82782	1.66892	2.37306
Dagze Lake	31.89	87.52				1.92504	3.25942	6.81682	3.47993	6.57894	3.89486	6.92224	3.61048	2.96598							2.61854	0.3073	4.69346	1.8881	2.60697	2.06223	3.28162	1.86025	2.36864	2.90324	2.60706	2.87042	3.18356	2.73774	2.32646	2.59146	2.55102
Lexie Wudan Lake	35.75	90.19		1.03615	1.43857	2.39633	3.25786	2.3259	4.68982	4.36816	1.60845	3.0839	0.868675	1.20107	2.99157	10.1172	5.5037	1.29065	1.79093	1.23363	0.9689	3.72968	3.54715	2.0325	2.34166	2.56692	2.89774	4.5259	2.30194	1.45174	2.06532	2.5484	2.24208	2.28244	2.19108	2.02282	1.9826
Paiku Lake	28.89	85.59			2.02285				2.96773	5.0089	1.80432	2.01256	6.63496	1.39303	1.37107	6.5782	1.47264	1.76028			3.75504	1.1644	2.69504		2.5202	3.5218	1.6947	5.65658	2.27578	2.35972	2.09398	2.15002	2.1174	2.0372	2.25204	2.0816	2.18924
Aksai Chin Lake	35.2	79.87					5.91012	4.43925	5.34225	1.7054	2.22594	1.9018	5.3189	3.19316	2.0468										6.5098	12.6115	5.16563	3.50562	3.27092	2.65546	1.92612	2.75988	2.8957	3.3823	0.91305	3.31846	2.98178
Maergaichaka	35.1	86.85					2.46955	3.5965	2.26186	1.00317	0.877575		1.80184	0.722833	1.67754	1.03197	2.0082	1.27156	1.20733	1.21337	1.7414	1.56003	1.31783	1.18715	1.5307	1.63315	0.9583	1.4263	1.5643	1.89168	1.91132	1.84622	2.34306	2.36318	2.27078	1.96688	1.71166
Laang Co	30.69	81.38							4.04025	2.32877	2.11103	2.53467	3.00768	2.2971	1.8542	3.65908								2.16003	2.26397	3.524	2.3792	3.03503	0.652	0.6024	1.91762	2.26154	1.92466	9.46383	2.4133	1.13157	1.0338
Bam Co	31.27	90.58		3.9071	3.85883	5.04467	3.52407	7.51987	6.41733	4.66205	3.4297	5.66597	2.76333	12.9376	3.27637					6.23083	4.59853	2.16052	3.24395	0.5558	3.40475	3.39575	3.33685	5.3427	3.6425	3.26634	3.4294	3.53306	3.27012	3.4633	3.65968	3.02712	2.8951
Gozha Co	35.02	81.07								3.7168	11.9216	1.8866		8.5903	7.3096									8.98654	7.7843	8.62757	8.19877	6.79218	2.37788	3.31442	1.90608	2.48514	1.3847	0.8851	1.7251	1.93674	2.18718
Zigetang Co	32.08	90.86		1.2586	3.589	2.94405	3.76735	6.53756	5.86147	1.11575	1.47107	4.82568	5.05406	3.7503	4.47163						3.9225	4.84344	3.99736	7.484	4.36448	1.8068	1.87032	4.66174	2.8773	3.31536	2.70156	2.5131	2.8138	3.09294	2.55576	2.35686	2.946
Yuye Lake	36.01	88.68						4.5299	8.20717		4.52323		8.76625	7.44665	5.61268		6.64095	3.22677		3.6654	0.8533	7.43608	2.92845	1.90352	4.5533	3.30875	4.81596	1.28385	2.79406	2.55784	2.65002	2.74918	2.65987	2.68174	2.34624	2.24704	2.64176
Ruola Lake	35.45	88.39	9.6782	2.23353	1.5516	3.1239		11.2567	8.2132	5.334	1.44775	1.1741	4.92443	1.37083	4.10732	4.38386	1.62252	1.14665	3.4535	1.93598	2.8628	1.57228	2.46017	1.413	1.84662	1.40537	1.4193	3.9894	1.97726	1.52442	1.5316	1.8996	1.9291	1.85968	1.68394	1.3753	1.80212
Rencuogongma	30.93	89.72			1.82655	2.45465	0.7595	3.63717	6.79542	1.00687	1.1022	4.56705	0.8	0.6162	1.24113					1.28153	1.84	1.25913	5.2089	2.15932	2.43678	5.83133	3.16978	6.5238	3.49494	4.00234	4.24452	3.81936	2.60468	2.52638	2.75092	2.69785	8.63124
Jianshui Lake	35.28	83.07								10.6238	8.32062		10.1472	1.80853	4.43965								4.86175	3.2271	3.31572	4.44305	5.97414	2.18407	1.17314	1.07662	2.0439	2.079	1.69528	1.40018	1.8526	1.20768	1.48266
Xuru Co	30.29	86.41			1.7339	1.88098	4.3673	2.45547	5.21496	1.32287	2.95653	3.3067	3.1145	3.30763	3.47734	4.61662	3.18285	6.9252			6.64823	2.13456	3.26044	7.28985	3.66574	2.99272	0.592933	3.49428	2.62872	2.47264	2.26566	2.68858	2.72906	2.44854	2.69768	3.2931	3.60376
Rengqingxiubu Lake	31.28	83.45							3.0617	6.92786	4.07147	5.55375	1.96913	0.7944	4.72894										5.7644	3.4248	1.95555	4.59937	3.16114	3.12024	3.0355	2.67658	3.31326	3.13326	3.30952	2.883	3.1026
Qixiang Co	32.45	89.98	1.81325	4.91165	1.52336	2.519	3.23422	4.18135	7.6005	3.18086	3.65353	0.679067	2.0124	1.25658	6.84796			2.0744	3.3394	2.2047	2.68074	1.40306	1.53198	2.3095	1.1508	1.99995	2.33023	2.27308	2.3847	2.86222	2.44002	2.63684	3.14468	3.66698	1.84074	2.5669	2.42426
Yibug Caka	32.94	86.71						10.3756	5.90577	5.82234	5.78878		10.5942	6.39904	5.1535			1.60664					1.56298	1.7102	1.55686	1.38378	1.59532	1.5736	1.9587	1.86898	1.71212	2.2269	2.29858	1.56376	1.30502	1.49426	1.25475
Pung Co	31.5	90.97	5.62615	5.58315	5.44257	7.94376	5.02688	5.18432	4.47213	3.49738	4.81252	3.51757	5.29888	1.92832	1.2909			2.60047			2.48286	4.26458	2.56007	5.82906	5.33218	3.38445	5.24558	9.26908	3.24127	2.67928	2.41174	3.78596	3.62882	3.13196	3.00626	2.64274	2.88156
Coni	34.55	87.17					5.97935			4.28826	5.4994		1.96232		1.66007			6.75364	3.9716	2.20957	2.8267	4.8743	2.9077	3.42345	3.50457	2.80556	3.36456	1.386	2.40072	2.88776	2.62064	2.08056	2.35686	2.67544	2.03512	2.59674	2.11214
Yang Lake	35.41	84.59								4.29454	6.7322	1.89613	10.094		11.4252			2.86143					3.35216	6.81827	8.13566	6.36268	3.50934	6.00014	1.6324	2.68012	0.72485	2.78316	2.60104	2.5081	2.6926	2.98324	2.7645
Meima Co	34.22	82.31								8.94173	8.7558	6.49666	10.0878	8.30118	9.10057		3.07233							4.29276	7.73404	13.8994	8.66316	5.05962	3.1802	3.18354	3.0044	3.14914	2.9514	3.17044	2.8222	3.07118	2.8652
Yagen Co	33.01	89.8			8.3954	5.09165	10.7413	3.28202	7.49372	5.86202	12.4655	10.3257	7.70164	4.6118	5.06324				2.02942	2.574	2.60626	1.771	2.72668	2.63394	2.32952	2.8436	2.55224	2.54166	1.91928	2.33552	2.27122	2.38138	2.56426	3.07192	1.18908	2.41478	2.4604
Dung Co	31.71	91.16	3.89413	7.3552	6.17006	5.47242	5.07992	4.31564	3.30392	10.2521	9.16512	6.5588	10.1441	7.20972	3.62468			4.64835			2.27204	3.00295	1.79696	0.7836	2.66217	2.95826	1.33233	2.72293	2.55348	2.96966	3.14162	2.9286	2.82348	3.16568	2.66884	3.23202	2.62226
Mucuo-Bingni	30.64	86.26			4.69828			4.6165	3.78503	2.86622	0.51055		3.7898	6.62767	4.1524	8.74654		5.93014			5.10684	1.98275	4.88628	8.98282	7.2711	4.73474	2.23742	5.7513	3.75516	3.60076	3.67318	3.2209	3.51112	3.73034	3.0742	1.29966	2.78006
Palong Co	30.89	83.58			4.2248	3.03013			4.44225	8.8725	2.25512	2.3842	6.46772	4.86968	6.12214			1.55497			1.93363	4.56902	1.90693	1.45867	4.60714	4.43318	3.50538	5.016	2.18534	2.87867	2.10006	3.57477	2.61942	2.90335	2.73402	3.75992	3.00243
Jiesa Co	30.21	84.8			4.59797	4.75324		6.70258	6.4365	2.24598	3.2626	4.23726	4.1164		2.06715			2.70516			1.19892	3.82007	1.98844	3.29566	3.4928	1.19492	2.88053	4.91665	2.913	3.32468	3.46276	3.27224	3.36842	3.28888	3.47162	3.1884	3.47568
Bangda Lake	34.95	81.56							3.67005	2.11017	1.9606	1.3211	1.3856	2.31417	1.60005		2.62478	4.71598						1.39525	6.43736	3.25203	10.5889	8.07534	2.69035	3.51317	2.60405	2.36484	3.4174	2.30368	0.81392	1.82824	1.75468
Bairebu Co	35.03	83.13							4.1482	0.8148	1.06367	3.25046	1.57535	0.86976	0.9843								1.96067	2.17687	1.48533	2.70443	9.54443	6.68604	1.6616	1.6014	2.04402	2.17282	2.70944	1.91094	1.55583	1.88858	1.70075
Zhenquan Co	35.93	86.89						7.7107	6.67652	3.03827	2.74657		2.63045	1.21753	3.47266	5.19778	3.25523	3.12603	2.36815	1.7369	4.51432		6.2055	4.66587	8.34476	3.19898	2.22894	0.97585	3.9638	3.54366	3.60354	3.31028	2.97118	1.10958	3.21552	3.69916	3.35312
Dawa Lake	31.24	84.97			3.4714	0.54515	2.06753	3.2597	9.16202	4.00188	4.1081	5.7329	5.52623	0.618267	4.03042			2.72707			1.90937				4.2845	3.6759	4.0558	3.26214	2.91836	3.11352	2.8986	2.89978	3.4893	3.10012	2.90436	3.15204	3.15514
Mingjing Lake	35.07	90.56		1.30437	1.29508	1.9956	4.32218	1.2547	2.87144	1.77376	1.8113	11.0647	2.2516		2.77623	2.36025	1.56973		1.58416	1.64865	0.91295	2.91533	1.28676	1.3721	1.12506	1.63153	1.35494	1.56098	1.74338	2.0852	1.72268	1.85198	1.98848	2.21054	2.00072	1.98152	2.15222
Lingge Co	33.85	88.6		13.1883						7.0788	2.68126	4.61172	2.13837		3.35288	5.04318	1.73733	1.3977	5.48642	8.9392	2.64012	5.47726	3.38502	3.00914	3.28185	5.54313	3.00827	5.76416	2.81652	2.55994	3.59128	2.62968	2.22012	2.11364	2.69928	2.4636	2.55606
Bange Co	31.74	89.51						1.56686	3.13115	2.04858	2.71794	8.98304	8.37634	8.78737	5.43295						2.44606	2.28736	2.05626	1.84974	1.20176	1.50872	1.46538	1.46998	1.66962	1.83474		3.0843	5.01408	2.7725		2.72156	2.73468
Ze Co	34.16	79.78					3.84105		2.51586	5.55572	2.37476	5.92328	6.38567	2.96267	2.37667			3.86767						2.14087	1.88585	1.91648	4.14472	2.13764	2.80822	2.7215	2.26464	2.32966	2.68802	1.92164	2.48144	2.90628	2.86834
Xiangyang Lake	35.8	89.42	1.75865	5.81075	2.54043	1.3513	4.19063	6.9101	4.80465	5.61507	8.06596	7.0961	1.7563	4.88354	6.10394	4.77954	5.14018	2.9314	1.51378	1.8109	2.37465	2.2419	2.1162	0.768	1.2787	2.91903	5.21077	2.2056	1.51348	1.53574	1.4181	1.60932	1.70174	1.87076	1.35348	1.39992	1.1876
Gomang Co	31.22	89.2			2.77395	4.07198	3.9728	2.52497	4.28167	1.0791	0.9084	2.14627		2.18787						2.07303	4.60046	2.85268	4.92333	4.57925	1.3873	0.528133	1.15183	2.0307	1.29618	2.22878	1.3116	2.42894	1.14587	2.36672	2.48138	2.08644	2.30018
Amu Co	33.49	88.7				2.37125				3.38082	3.31307	1.00143	1.17905	3.05314							0.9705		1.67376	6.4831	0.78134	4.62248	1.6606	3.27646	2.09852	3.6547	2.27124	2.20248	3.61278	2.248	1.67402	2.4902	2.1612
Jieze Caka	33.95	80.9								2.8692	4.87622			5.60325	3.9146			5.38805						4.13992	8.5908	4.1671	0.2656	5.48823	2.25596	2.85243	1.80882	2.41436	2.43472	4.43968	2.49312	2.22792	2.29392
Heishibei Lake	35.56	82.74							1.63548	6.72253	6.57205	0.4317	4.8794	0.98435	2.18384									2.3504	6.24252	0.854425	6.39106	1.98898	3.39255	2.31628	2.60598	2.67628	2.74208	2.08426	2.83522	2.98858	2.7631
Dajia Co	29.84	85.72			2.08942	1.09885	1.3692		2.12417	1.05697	4.07166	1.01172	9.7517	3.28797	1.83473	2.49305	8.77454				2.49055	3.36942	2.33593	8.01568	4.0044	3.23772	5.2864	5.61785	2.02902	2.9322	2.63508	2.7166	2.22072	3.04092	1.41792	2.80684	2.01058
Cam Co	32.12	83.55							3.0748	1.85392	4.7935	1.19725	6.09504	6.6304	2.77643										1.66543	2.56942	3.01123	4.6893	2.42184	1.77862	1.73866	2.49622	1.86092	2.92644	3.30154	2.00106	3.31346
Tong Tso	32.18	84.74					12.1865	5.83592	8.77132	10.0702	9.404		7.38396	10.2579	4.72042						1.79482				1.75854	2.00862	2.12974	3.13506	2.178	2.2654	2.08824	2.1991	2.04068	2.1054	1.22636	1.51566	1.50226
Longmu Lake	34.61	80.46							7.42595	0.969067	1.707	2.01072	1.25783	3.48937	1.22454									1.52123	3.76127	1.12933	1.2244	0.9691	1.77538	1.56822	1.37326	1.66082	1.56948	7.36575	1.66336	1.5087	1.3464
Caiduochaka	33.14	89.05	4.33928	6.3896	4.05902	2.01698	6.0244	2.2352	5.28734	7.54424	9.35854	4.81264	7.21152	2.40956	7.46098		1.7531	1.76578	1.45098	1.64778	1.49844	1.21938	1.64606	1.69784	1.29574	1.47386	1.4462	1.81238	1.3922	1.6202	1.34284	1.55526	1.59512	1.63728	1.4862	1.59804	1.50084
Bengze Co	32.01	88.69			9.67902	0.816867	5.05032	1.4934	0.3114	0.60945	1.85365	2.40897	3.7746	1.51495	1.12374							3.70237	3.6485						3.00563	3.04582	3.27463	12.2611	2.98395	3.64653	2.25282	2.35284	2.17322
Cunzhang Co	30.97	87.47			1.8098	1.0455	0.76725	2.70212		6.06613	1.1753	2.5921	0.978	0.8166	1.27282	2.1268					3.0299	2.90216	2.39952	1.49585	1.25753	4.46232	3.0858	2.90796	2.5442	3.33898	3.02258	4.23504	2.68608	6.419	2.48647	4.11388	2.3482
Meiriqie Co	33.64	89.72		3.03028	2.40987	4.81337		2.53332	5.0006	1.78685	6.82214	5.70188	8.28122		2.3932			2.52036	2.61204	2.0282	1.22076	2.54028	1.1028	2.09507	2.4986	2.46396	2.67628	1.99674	2.66772	2.41508	2.30316	3.06896	3.3781	2.42026	2.40444	2.3996	2.36318
Dulishi Lake	34.73	81.89							2.27755	12.1421	1.77166		2.1589	3.86374	4.71678									1.4657	4.44433	4.69293	1.50635	4.58573	2.55634	2.35846	2.65806	3.08758	2.9254	2.68012	2.65054	2.0066	2.64826
Cuodarima	35.32	91.87	2.70324	3.34448	4.00547	6.7396	4.56562	4.13192	6.53103	6.83154	4.3904	1.66904	7.86012	5.257	3.2594	2.60576	4.44776		4.55834	2.65074	2.46832	3.3474	3.1023	1.19428	2.1109	6.9397	2.9122	3.3208	3.17018	3.01496	3.29514	4.0069	3.11312	1.1476	2.9622	3.24058	3.3518
Lagkor Co	32.03	84.13				1.80683	3.0951	6.6919	5.30934	1.94157	9.68822	1.5076	1.14467	1.528	2.0025			2.3862			2.42906			3.82154	5.3066	2.50617	2.58657	1.64004	2.3953	2.32508	2.7034	2.25387	1.20768	2.11968	2.33266	1.79878	2.31558
Eyacuoqiong	32.98	88.7	10.7495		3.2988	2.47258	3.49984		2.4172	2.46563	2.7073	4.81662	4.12366	5.4767							1.90053	3.63472	1.67397	1.9892	1.97398	2.7801	2.69398	1.93552	2.30692	2.06076	2.10846	2.28526	2.62346	2.5899	2.11582	2.15002	2.06272
Norma Co	32.37	88.03				2.90282	6.621		5.27888	1.59983	5.00177	3.29204	1.56885	2.5804							2.46015	6.72366	5.861	1.73783	2.84668	2.1697	0.6778	4.9746	2.00084	2.63468	2.49122	2.31594	2.4301	6.02186	2.60642	2.50718	2.77913
Quemo Co	33.89	91.2	1.61535	9.93237	6.4089	4.27665	5.69583	3.2334	3.06672	5.97707	7.33567	0.6873	2.1794	3.85772	3.15643		8.21863	5.94415	3.8145	9.04063	5.72262	1.53135	8.15157	1.76875	1.4427	5.45332	8.81003	1.40673	3.2691	3.5058	3.52378	2.92058	2.03034	1.19596	3.67164	3.7521	3.00826
Nairiping Co	31.3	91.47	3.3484		2.98942	5.54553	6.42162	4.9536	4.15545	8.152	2.25535	5.64224	3.0677	1.84573	2.2834			1.8959	3.71788	7.2046	4.09895	2.70198	4.17553	5.57708	1.0598	2.67848	5.5675	1.6609	2.49826	2.85678	2.52066	2.73062	2.57876	3.28902	3.02318	6.24538	3.01808
Buruo Co	34.4	85.77						2.44653		1.35715	3.29463		1.2498										1.6298	1.1099	1.23455	4.40985	8.91915	4.56565	1.56656		1.26978	1.84298	1.57802	1.41662	1.56022	1.42233	0.95578
Saibu Co	32	88.22			3.13043	6.86105	3.1819		3.208	3.2523	3.20078	3.22856	7.64578	3.42893							3.21374	5.96505	3.68934	3.73905	3.54705	3.99948	4.19942	4.47142	4.47423	8.23627	3.67498	4.1685	7.92543	9.85105	3.67492	5.8083	4.19113
Co Ngoin	31.47	91.5	1.1817		1.67446	1.0965	2.43752	0.73965	0.6449	8.3332	2.03192	8.55373	1.7278	1.25014	4.63998			1.44282	1.3275	7.84368	2.59192	2.79517	3.37482	1.44875	1.38007	0.982667	3.23206	7.5366	5.1595	4.91194	8.02398	3.67315	3.1633	2.10288	2.53605	1.90836	2.36833
Xuejing Lake	35.98	87.38				4.83768		11.1042	6.60777	3.70496	5.01234		2.84084	3.99058	3.4984	3.29875	5.09718	3.25254	2.69934	2.564	3.28504	3.29784	4.02118	3.6961	4.66308	1.1881	2.40672	5.64178	3.50124	2.42288	3.4918	4.47672	3.21505	4.85272	3.4887	3.10025	3.08528
Padu Co	32.79	87.83			1.36497	2.46902			1.28023	1.17802	1.47578	2.19872	1.77242	1.64104							2.70392		2.68398	2.84236	2.14544	8.2789	5.9905	3.08076	3.63732	4.00793	3.20814	2.8402	5.9674	5.11	3.01668	2.61652	2.90346
Yongbo Co	35.74	86.69						6.15596	4.36272	0.83645	2.30626		1.39478	4.54004	2.83654	1.49743	3.50402	3.03145	2.70532	3.77066	1.78756	2.23728	3.76778	3.13882	3.13568	5.01066	1.94208	2.99306	2.65484	2.66272	2.77354	2.58136	2.86224	2.96718	2.7106	3.39126	2.6868
Lian Lake	35.58	90.28		1.9948		3.89712	1.0964	2.33263	2.67675	1.41917	1.8529	4.90915	1.59573	2.4565	2.72337	7.1668	1.42588	3.10137	2.48565	1.42695	3.07305	2.46177	1.3482	1.85497	1.78383	5.5106	4.00037	2.52303	1.78034	1.36912	2.19415	2.97923	6.01903	1.6588	3.6373	2.35085	2.78324
Gaerkongchaka	33.97	86.49						3.69762	6.99504	5.72363	5.14376		7.96148	6.76018	8.14042	4.97836	6.34632	1.41728	3.30282	6.18532	3.4949	1.88934	1.92688	2.14736	1.29888	1.18297	1.00375	1.5234	1.6229	1.86654	1.19348	3.01496	1.92574	1.75228	2.48268	2.2415	1.88016
Pongyin Co	32.9	88.2				5.10642			6.8514	5.62656	12.533	7.14476	11.0382	5.6041							1.9034		2.3575	1.00407	1.2263	1.16674	1.24598	1.19738	1.37832	1.23602	1.21154	1.30702	1.07738	1.53174	1.30186	1.45796	1.33152
Kekao Lake	35.7	91.36		2.5917	6.14096	3.41195	2.56787	3.18635	2.58598	3.843	3.17603	2.86543	1.8961	3.94315	2.96684	5.60422	2.42904	5.19096	4.18356	8.38808	3.05796	3.69923	6.14302	5.6171	2.72863	4.23598	2.31418	2.62416	2.56938	1.61928	1.0684	2.16026	2.56102	2.42126	2.69138	1.95328	2.1243
Telashi Lake	34.81	92.22	3.7158	3.73527	2.24128	0.966025	1.2549	1.51427	0.820467	3.47308	3.42278	7.47048	6.84566	4.17547	1.09533		4.11577	1.72775	1.29066	6.48197	1.67284	3.28433	1.2187	0.2254	1.4294	1.44383	0.537325	1.38456	1.67008	1.85492	1.7367	1.82028	1.83524	1.58028	1.63692	1.87466	1.1573
Aweng Co	32.77	81.72							4.52825	5.80386	9.0348		6.3329	2.43044	1.33793		5.64222							0.597567	2.5375	0.75035	0.7842	0.34335	2.29236	1.9794	2.43316	2.51968	2.12754	2.02364	2.25988	2.08106	1.02507
Nawu Co	32.85	82.18									0.5987		3.486	1.5044			0.676225								2.43412	0.84635	4.8948	2.70284	2.80382	2.52248	1.37716	1.63702	3.0155	8.89324	2.28338	1.69582	4.6783
Dongqia Co	31.78	90.4	3.6576	6.23995	2.67588	5.0001	1.7825	3.12825	6.50003	7.65935	1.2352	3.1946	1.45108	4.89405	2.39342			4.83487			1.12323	1.52107	1.87965	2.02377	2.83703	2.09237	2.70643	1.96067	1.88874	2.37826	2.53828	2.7378	2.348	2.25176	2.99908	4.30263	2.02846
Gemu Co	33.66	85.81						5.63282	7.4437	10.4179	11.5338		8.17516					6.4943					3.39596		11.2656	1.9433	0.982533	1.88043	1.88366	2.59598	2.56672	2.2715	1.28986	1.39058	1.28588	1.24086	1.2395
Daru Co	31.7	90.74	0.5	0.78935	2.10232	3.7926	2.81	3.62854	2.80777	1.9917	2.83515	1.2558	4.5023	3.51697	3.04645						2.41643	1.58195	3.59143	2.3363	3.0226	4.01308	5.26722	4.0917	1.46006	2.84254	4.17165	3.35014	2.40264	3.5488	4.03768	4.4381	2.4224
Angda'er Co	32.71	89.58	10.0974	6.80846	5.59182	6.86302	9.24774	4.89168	6.06162	4.3092	7.63346	6.00024	8.58106		6.1583				2.50202	1.52478	1.85308	1.64384	0.97908	1.35374	0.964867	2.1187	1.89026	2.6428	1.47954	1.55812	1.55642	1.70572	2.23032	2.15702	2.02464	2.24002	1.74548
Laxiong Co	34.34	85.23					2.546	3.8895	3.09447	4.23566	3.5475		1.60915										9.00526	3.87803	2.40657	9.10596	1.35645	8.4222	3.03332	2.79518	2.56478	2.7818	2.59604	2.35794	2.79282	2.17562	2.57908
Salijilegannankule	34.68	79.69					4.14426		3.27537	2.79088	4.3491
Youbu Co	30.8	84.79			4.10984	3.7939		4.1195	2.61702	3.0657	4.42844	3.5563	0.85525		8.16736			1.4612		1.5118	0.68415	2.64742	3.5421	2.80858	2.7666	1.4144	3.30134	3.36222	2.30168	3.1364	1.4853	3.04082	2.24304	3.7732	2.04716	1.83066	2.18366
Dangqiong Co	31.57	86.74			0.820367	6.79214	4.0171	7.88228	4.75492	6.03718	6.62754		9.27854	8.13346	8.59298			1.65418			1.33163	1.80193	1.87913		1.01963	1.03317	1.23968	1.64363	1.40108	1.26746	1.14292	1.20958	1.72338
Heart Lake	34.39	84.25							0.3545	0.74476	1.26566	1.33674	1.32958	11.3306	5.94396			1.84078					1.75142	1.4156	1.35024	1.5739	1.47156	1.27064	1.75228	1.39946	1.4366	1.86736	1.34714	1.9207	1.73408	1.50224	1.47076
Guopu Co	31.86	83.17							0.9953	3.64372	2.62845	8.87976	2.69424	3.72363	3.00272			1.93818						9.71248	1.24082	1.68553	1.40277	0.4725	1.99	2.27966	1.90878	3.29796	1.7194	1.16292	1.63618	1.70576	1.46742
Changtiao Co	33.96	82.97											3.83183	4.4804	8.30757								1.88496	10.818	2.46015	1.93586	1.1276	2.0436	2.59634	1.75144	2.18174	3.13225	1.54168	2.6201	2.9539	2.76646	2.56874
Deyu Lake	35.69	87.26											2.90504			8.85018	3.46636	11.1749		2.10428	1.87102	2.97432	2.09358	3.11826	1.67244	6.92378	3.5343	3.7006	3.16648	2.81864	2.40698	2.48396	1.67074	2.80006	1.1317	1.99652	1.3677
Xuemei Lake	36.29	88.26	2.91772		7.8327	3.66166	4.08558	4.08076	4.89088	6.47704	4.89782	3.88586	3.96414	3.97868	4.35602	3.40453	3.89526	3.94722	4.8052	4.67306	3.66358	5.06308	3.39915	2.92868	3.5908	3.56734	3.68564	6.1742	3.19716	3.38954	3.13274	3.04076	3.7915	3.05288	3.14746	3.13444	3.203
Changhong Lake	36.04	85.98							4.9823	3.84574	4.20286		6.6263								1.5958	5.30287	6.20284	1.86702	0.6807	0.600933	2.34543	3.8482	2.6508	1.47896	2.13778	2.30128	2.2728	2.6945	2.33468	1.97202	2.27726
Duoqing Co	28.15	89.36			1.10324	1.4055	1.59293	1.48007	1.4055	2.23233	1.76512	2.0648	1.43846	1.3235	1.482	1.26934	1.3319	1.28978			1.95022	0.63726	2.1037	5.08173	1.23945	3.50634	1.44165	2.452	5.06198	3.90218	4.96696	6.02618	7.04462	9.7183	6.96614	4.29432	2.20646
Longwe Lake	33.87	88.31						8.46546	7.48826	10.0525	10.1079	6.83652	9.43346	7.40486	4.02284	3.32702	1.84072	2.02352	1.34002	0.52874	1.56098	1.71322	1.3323	1.8167	0.85948	1.1552	1.2959	1.1621	1.17112	1.27354	1.3298	1.33102	1.5435	1.53232	1.27818	1.44508	1.53018
Weishan Lake	35.96	89.25	1.27623	4.86088		7.99702	5.71438	5.46772	7.22298	5.8626	4.32672	6.53814	5.76186	3.63482	3.2189	5.3048	4.0554	3.91366	3.606	4.92345	2.23896	1.335	2.72204	2.83296	1.99527	2.24264	3.75802	2.69642	2.79884	3.8881	3.45418	2.03178	3.85218	2.63134	1.50373	3.29156	2.79226
Sandao Lake	34.76	83.9																8.8028					4.15788	3.60118	5.3876	3.1365	4.12784	2.68682	3.35925	2.94417	2.64332	5.67983	2.1583	2.08212	2.95636	3.65976	2.59788
Chali Co	31.63	82.33								10.6698	7.11368		3.9601	5.1402	2.68772			3.63766						2.06928	2.86466	3.60728	3.78602	2.87268	3.84122	8.97502	5.29684	6.51076	5.1865	3.37068	3.381	1.04908	3.19134
Xianhu Lake	36	88.07	3.58335	1.97442	4.4253	1.69463	1.50555	11.2071	6.31826	3.60883	2.12464	1.59458	3.93448	3.54416	2.64312	3.29472	2.4188	4.6143	7.1256	2.0488	1.07773	1.22356	0.669225	1.7949	1.97632	1.66	5.40722	3.87248	1.36542	2.18124	2.79962	2.45454	3.38138	2.42372	4.18262	2.82576	1.31813
Shenco	31.01	90.48	1.43514	2.86054	4.18532	0.6343	1.0328	1.20503	1.492	0.527733	0.541567	1.06475	0.90644	0.352067	1.4428		1.01205				2.78457	1.99075	1.04697	1.55795	8.49604	1.12068	0.7266	4.31307	1.74436	1.56366	1.92646	1.45288	1.08864	1.59386	1.66254	2.04504	1.76656
Chapo Co	33.36	84.19							6.13936	5.46306	4.16324		9.963	2.97423	4.8225			8.67042							2.24574	2.22224	2.007	2.3448	1.66782	1.61962	1.73542	1.33398	1.64232	1.66614	1.5084	1.74162	1.67404
Yanjian Lake	34.71	89.04	2.22945	0.798733		2.91242		2.21005	3.8687	1.2435	1.41478	10.1404	0.97486	4.74715		0.73975	1.34145	2.17575	1.82917	1.84324	0.7741	7.56112	0.555875	0.81675	8.86344	3.22522	4.18356	2.22432	2.68582	2.16358	2.47026	2.31262	2.54152	2.35782	2.3565	2.47674	2.27496
Caimaer Co	33.55	84.59					10.2096	1.87098	2.30687	6.14102	3.7917	3.99117	8.46245	4.44055	5.06108			1.3226							1.15076	0.79072	1.2275	1.2128	1.77372	1.19404	1.35894	0.98936	1.51442	1.48318	1.32214	1.21402	1.62812
Zhaxi Co	32.2	85.12			0.881733	1.98155	5.72502	3.47138	1.26495	0.96015	1.48875		1.31613	1.06976	3.82618						1.74828	7.07098			5.81092	6.3354	5.0461	2.00187	2.19732	1.59614	1.74432	6.93498	2.16254	2.61264	1.83372	1.8629	1.62146
Yinbo Co	36.19	88.14				3.90174	3.85228	5.3825	6.41466	7.73127	5.06536	9.45152	4.50684	1.6099	3.42764	7.40672	4.19412	4.0102	5.10105	3.35333	2.93863	6.0364	6.87112	2.52447	6.90738	6.99152	4.0879	7.46446	2.30577	2.0317	2.6414	4.7739	2.39825	1.82555	1.3527	1.43285	2.0616
Haobo Lake	34.42	88.04					2.3682	6.18397	4.0308	2.03656	1.95384	1.99678	1.9617	8.4614	3.77322	2.53558	2.20013	4.51722	1.18283	1.8623	1.67522	1.72628	1.37036	2.54697	1.40783	2.60237	1.52246	0.97462	2.24728	2.37196	3.907	2.49282	2.23258	1.54806	1.33848	1.473	1.22924
Tso Tang	34.89	79.36					1.97172			6.5388	8.85002		1.9556	5.63132	4.62716			1.48114							1.37662	3.17186	4.1654	4.46294	4.0611	3.78047	1.93146	2.27598	1.87826	2.05424	2.01578	2.80122	5.62696
Xianqie Co	33.67	81.37							5.53782	0.82544	1.56114		1.39918	0.23205	4.5428		1.946	1.38853						2.11538	1.9051	1.36088	2.0493	1.55656	2.23094	2.32894	2.50366	2.7674	2.61826	3.05973	2.52838	3.58975	4.67248
Coga	33.1	80.29								1.14633	5.30344		1.56512	11.8371	1.45047			3.76022							2.51146	2.48526	1.0325	1.80914	2.88362	3.0385	2.52504	2.97036	2.3507	2.86298	3.0815	3.05518	3.46446
Kunzhong Co	33.1	80.39								1.84723	0.835167		1.55763	6.8182	1.99148			2.9097						3.24473	3.44985	2.83387	1.63673	1.4266	1.96572	1.65336	1.85088	1.4562	1.64698	2.22414	3.99845	3.77157	5.38385
Mang Co	34.49	80.44								4.72222	1.65048		1.87136	4.34948	1.5583									2.2097	7.69392	0.8953	6.83596	1.23086	2.91366	2.36454	2.61642	2.65592	2.93478	3.56664	2.86104	2.65778	1.8645
Cuolongjiao	34.42	80.51								4.58282	3.83998		1.7533		8.00894									6.94188	8.37766	0.20735		0.7081	1.56864	1.19774	2.1602	2.45378	2.10406	1.88166	2.19336	1.9467	1.8917
Moming Lake	34.85	80.23					2.68867			4.50228	5.42563		6.76038	7.71112	2.1312			3.7797						3.64492	2.3968	5.89537	1.52745	1.57792	2.62544	2.82367	3.04354	2.75344	2.44908	2.78926	3.06952	2.73264	2.93664
Quanshui Lake	34.76	80.18								8.2114	5.97452		5.8641	4.02452	2.6701									2.11197	2.31217	3.61257	4.8647	2.24434	3.01388	2.69592	2.10186	2.23614	2.87728	4.1674	3.12662	2.50624	2.87712
Wuming Lake	34.66	80.69								2.5255	7.96712		3.33864	9.67434	8.81306									5.8668	3.45866	4.88412	1.34817	2.41254	2.21438	1.51486	3.73658	3.37376	2.45782	1.96376	3.65512	3.54292	2.74506
Songmuxi Co	34.61	80.24								2.14137	1.75292		2.92883	2.2893	1.75538			2.00153						4.55498	2.2428	1.80563	5.00926	3.7284	8.55464	2.42844	2.17236	1.7869	8.98796	2.1065	3.61782	2.51084	5.0455
Wulukekule	35.67	81.62									4.79523		6.59007	5.08153	2.9754								1.98718	2.91158	1.92154	3.99946	1.9336	3.24604	0.54986	3.62984	0.980667	1.85256	2.0124	1.70124	1.9839	1.90027	1.9902
Jiuma Co	31.17	81.64									2.16503		5.05048	4.54468	3.70455			3.37163						4.90745	4.2623	5.77184	8.3869	1.2766	2.39234	3.56754	2.84504	2.84398	3.18508	2.00002	3.25522	3.53302	3.537
Sekazhi Co	32	82.05							2.64407	6.59868	4.81122		4.9056	2.44525			11.3306								4.79002	1.24426	3.74646	2.46984	2.36624	1.77748	2.60442	2.61462	2.78352	2.05792	1.17252	1.6231	1.29864
Kunchukechu Co	33.72	82.67								6.34757	3.79046		7.53908	7.45285	5.32468		4.87762							3.5835	1.3008	3.41125	1.3355	5.62665	2.59698	2.63464	2.22636	2.08714	2.39076	2.06412	2.55874	2.16882	1.86914
Bumu Co	33.26	81.65											4.80813	1.03957	4.94965		0.2409								0.2697	6.0867	3.79893	3.8474	2.4981	2.4951	6.57066	5.85978	3.2249	2.45932	4.72622	3.05842	2.56442
Wuming Lake	34.92	81.69																6.71065						5.92964	5.57417	1.79987	2.37838	4.85673	1.8001	1.81684	1.68072	8.00744	1.65632	1.20768	1.7802	1.71332	1.90834
Yueya Lake	34.92	82.22								7.14144	2.9955		5.3806	4.6498	6.16796										5.80462	8.13704	9.39854	6.11885	5.94878	5.94688	5.32902	5.88022	5.13242	4.34252	6.12113	5.72147	3.12445
Puer Co	34.88	81.96								1.2879	3.47483		0.918567	1.83467	0.7687									2.93407	1.65213	0.9166	3.70463	6.80748	6.47635	2.24814	1.60806	1.9164	7.21538	7.49198	2.00982	1.87387	3.62112
Qiagong Co	34.44	82.33								10.6682	4.71124		3.2703	4.60368	0.7338									1.54712	2.11917	3.3587	2.88913	3.1851	1.52112	1.50818	1.3539	1.6504	1.8137	1.69338	1.53738	1.65258	1.78832
Sijia Lake	34.04	82.61							3.66784	4.47874	4.45878		8.98058	2.96105	3.44198										3.43887	2.12385	0.8496	0.72044	1.373	1.8521	1.93998	1.2697	2.06996	1.85078	1.72312	1.5973	1.75712
Wuming Lake	35.54	83.13								8.50198	8.86232		7.76912	7.61196	8.88442								1.61265	3.19077	1.26545	2.33907	1.52513	1.0817	1.32175	2.20066	3.36912	3.02252	3.36372	2.40594	1.17272	0.76144	3.5446
Bero Zeco	32.43	82.9							2.00995	3.52933	3.66843	4.0851	4.36677	11.3306	9.4744		9.25743	3.46974						1.89174	1.57492	1.5199	4.87418	2.42798	2.59614	2.45928	4.16294	4.9372	2.8274	1.71756	1.35638	1.304	1.20718
Cuoguo Co	32.25	83.29							2.69307	0.88345	1.108	0.6067	0.5067	0.9253	1.6173											2.31995	0.7228	0.6637	1.27584	1.25562	1.03604	12.202	1.17576	1.3598	1.25098	1.13104	1.27416
Xiaga Co	32.31	83.81										1.89832	5.62585	1.56965	2.9077			1.85948							2.12914	2.6615	1.95718	2.17442	2.87328	3.45523	3.29535	7.08917	4.53396	2.5971	4.02208	3.17252	2.76678
Bieqian Co	31.93	82.78							1.06243	1.17857	3.8805		9.23702	11.4069	8.5608		2.09884	7.62426							2.8721	1.73497	4.22982	4.5768	1.90255	1.22952	1.61198	2.7186	1.99966	1.8197	1.1509	1.53908	1.23534
Chamu Co	33.26	83.01							1.0506	1.3252	2.2292	2.19312	2.8029	3.09912	2.003		2.03925	7.6448						2.24558	5.05755	1.47925	1.4545	2.1213	7.9376	1.13437	1.3224	1.43995	0.7609	2.17417	1.5939	1.361	1.35995
Darebu Co	32.49	83.22							0.8381	8.78053	8.60112	10.3307	7.91636	6.88026	3.0476			2.6237							0.9906	1.34862	1.87986	1.0762	1.1322	1.42758	1.58516	3.10875	1.4309	1.50408	1.57634	1.8796	2.0462
Kahu Co	33.39	82.97									3.53826		4.6953	9.24852	3.4848		6.31038	4.24246						1.19252	2.71185	1.63213	3.043	2.12843	2.0585	1.90498	11.3522	3.61953	2.77097	3.06714	1.22442	1.93646	3.15943
Labu Co	32.96	83.8							0.7316	0.42125	0.48895		0.96278	11.3306	0.6006			1.1726							1.22428	1.19496	1.22942	1.2157	1.25234	1.24146	1.24772	1.2328	1.22074	1.21172	1.206	1.20942	1.208
Wenquan Lake	34.43	83.56							1.99677	2.31465	2.59218		3.0877	1.88706	1.7802			4.27445					2.79676	4.47192	1.78384	3.75475	4.15155	9.4487	3.691	4.0849	6.71464	5.93036	6.55146	10.2813	9.37668	6.11098	10.1008
Xiaoquan Lake	34.08	83.68											8.95652		10.0237								1.33422	4.09732	0.55646	1.2487	1.16246	1.54078	1.48392	1.45454	1.40136	1.89278	1.70282	1.5521	1.48054	1.53316	1.70212
Yadao Lake	33.96	83.32												8.82706	9.6021		0.88494	1.7647					1.85832	1.78088	2.5686	1.60706	1.878	1.73752	1.52458	1.38458	1.56052	2.0157	1.71772	1.76022	1.20768	1.61182	1.55868
Gangma Lake	33.83	84.34							0.975375	1.7868	2.33438		2.73756	2.03588	2.6694			2.76736					3.2763	5.8291	9.63468	6.25127	4.37027	4.0922	2.86267	2.6842	2.2158	2.6384	2.17194	1.83976	1.69596	1.86838	1.3917
Buerga Co	33.66	84.38											2.06537	1.89915	3.5793			1.3452							1.93266		3.01555	4.01995	3.82222	4.8749	5.17566	2.11014	1.20768	1.2522	2.26526	2.28758	4.85797
Wuming Lake	35.02	84.48																2.6449					4.35284	11.7499	8.1129	1.1928	0.9683	4.19038	2.63766	1.6941	1.49788	1.95246	1.34488	5.6191	3.21334	1.99384	2.1059
Wuming Lake	34.74	83.51																5.93124					0.52485	5.58436	0.67535	4.08285	5.34474	2.86503	1.99496	3.44088	3.49418	6.35403	9.3002	2.21158	3.68578	5.81484	5.25502
Dao Lake	35.23	83.98																0.26035					0.783167	0.5773	0.5106	0.6545	0.3306	0.3716	1.64275	2.62593	1.80914	2.0062	1.41672	2.08416	7.73433	1.58124	1.50144
Shuang Lake	34.47	83.16								4.6107	5.5995		3.76688		8.2113			1.37922						0.886033	2.05653	2.5464	1.42178	1.76896	1.85156	1.52788	1.78948	2.1736	2.48188	1.8398	1.88248	1.45798	1.78712
Taoxing Lake	33.88	84.02							5.3883	1.04557	3.9673	6.1237	2.49215	9.99697	2.2771			0.784133					1.2184	1.3435	1.09983	1.44	3.0925	3.41352	6.28823	5.44805	3.52753	2.09114	1.17948	1.92372	1.51722	1.16806	1.1263
Akesukule	36.59	84.47								6.52867	8.59698		7.22696		7.0881			2.54095					3.74498	3.593	6.40428	5.96384	1.84472	2.49726	3.22106	3.22762	3.32172	2.71012	2.7941	3.0189	3.3129	3.198	3.66606
Wuming Lake	35.78	83.45																					4.75614	0.686767	4.75336	2.3999	0.839767	0.7511	1.4209	4.82538	3.82824	3.72248	1.689	1.6966	2.74498	1.7372	2.07304
Wuzhi Lake	33.72	85.12						7.07112					9.84388												3.23893	2.99195	2.53905	3.03537	1.97052	1.23276	1.15268	1.54642	3.2362	5.00912	2.21116	2.1117	2.4137
Qiuruba	33.31	84.81								4.61163	4.90932		6.43717					7.34732							2.10888	2.37184	4.21154	2.84252	2.42804	1.81754	1.88764	1.32614	1.25596	3.51248	2.27922	2.23002	4.20024
Ningri Co	33.32	85.58					1.82246	0.97	1.41717	1.9247	2.0233		0.94705					1.75413							4.91405	8.10872	7.25978	3.61106	3.78916	6.55384	9.9206	6.3034	6.60916	2.88967	2.50645	5.38758	3.44695
Zuoqing Co	33.01	85.37					4.39086	7.93888		6.3642	4.15233		3.83727					1.4307							0.994425	1.4095	2.26193	1.11442	1.55592	1.62207	1.54104	3.3294	2.23105	1.34922	1.3079	1.10528	1.31858
Rena Co	32.73	84.26					5.10473	6.02835	4.33775	2.83705	1.87543	2.1268	3.15427	0.7932	1.99333			2.9874							1.72022	3.93656	3.66664	0.7436	2.46966	2.65098	2.96626	3.06228	3.21018	3.33934	2.92414	2.82472	2.31964
Nading Co	32.66	85.47					1.27923	3.5259	2.85807	0.3504	0.90535		1.49933												2.3085	2.6597	3.56792	4.1583	2.5889	3.21306	2.09884	2.62646	3.1341	3.60132	2.9315	2.15012	2.27998
Jiaqing Co	32.45	85.77			0.420367	0.5183	0.812567	0.50315	0.7925	1.1602	2.6696		11.3222	2.75867	2.4511			3.11768			1.2772	1.1335	2.17247		0.3821	0.368525	0.75945	0.62925	1.33134	0.9421	0.894367	1.17465	1.16397	1.03583	1.51952	1.29645	1.58243
Duoma Co	32.96	84.46					4.85224	6.29195	6.7327	4.3712	4.05302	2.26292	5.98924	4.2697	3.56472			1.64955							2.59747	1.84443	1.53776	1.76873	1.71778	2.04192	1.37996	2.11184	2.05816	1.8123	1.21236	1.37004	1.13264
Wuming Lake	33.94	84.87						6.0764	9.66138				8.78432		9.57966			1.0961					1.4116	2.06882	1.51707	1.98018	3.50374	2.80474	3.50146	2.25896	3.44795	1.93386	1.2046	1.86896	1.31628	1.78858	3.06024
Wuming Lake	33.95	85.34					5.5004	5.80812		11.3309	5.3747		5.3129					1.50103					1.37332	1.1382	1.32402	1.55094	1.87968	1.05136	1.24646	1.4303	1.60326	1.61204	1.8361	1.39516	1.47104	2.13346	1.55364
Tuzhong Lake	34.53	84.7					5.17416	4.63096	3.95583	7.479	6.33625		5.05193		3.56506			2.10212					2.04042	1.58534	1.37554	1.13416	1.55278	1.60598	1.69648	1.6695	1.92332	2.0749	2.7943	1.849	1.19894	1.79016	2.1271
Wuming Lake	34.28	85.07						7.06616	8.96654	0.6301	7.3844		8.24362					6.97488					5.21152	4.53242	7.81752	5.90866	3.51852	2.9799	4.64954	3.52524	3.64498	2.61912	6.83153	2.7275	2.27178	2.72158	3.1969
Xueyuan Lake	34.26	85.72						2.0058	2.68253	1.16585	1.25398		0.7424										0.57325	1.0586	1.8757	4.65667	2.1184	4.4488	0.974333	0.68005	1.69896	2.2861	2.00412	3.66	1.5946	1.70304	1.74108
Daxiong Lake	34.05	85.61					1.71933	3.7674	7.2012	1.70177	2.12833	1.94155	1.65343										5.85977	3.3886	5.4759	0.77465	5.2871	4.02083	2.12184	2.19442	2.08226	2.08626	2.03722	2.25822	1.96508	1.92406	2.05174
Laxiang Co	33.97	86.05				1.77134	1.47508	1.1073	2.70513	0.6169	1.92467		1.16416	0.987867	0.87528	1.22384	0.62315		2.8136	1.24106	3.43805	1.00227	5.83635	1.381	1.9028	2.59638	6.27066	2.25573	2.03523	2.08537	2.3686	2.08713	8.6212	4.10035	2.7915	2.56358	2.16915
Jingyu Lake	36.16	85.72						10.1696		9.23154			5.23663									1.17233	1.04002	1.12572	1.00018	1.195	1.24354	1.59806	1.64846	1.49164	2.31396	1.92686	1.37794	1.36994	1.693	1.42976	2.08244
Banxi Lake	35.9	85.28						4.99273	3.25233	2.21963	7.1539		3.31137		3.31137			2.671			1.5256	2.46367	0.4632	1.59167	2.8951	2.81632	4.33357	2.162	1.88662	2.06182	2.22906	3.94313	2.5184	2.1312	1.88584	1.78028	2.52658
Baibing Lake	35.9	86.42	2.7084			6.08525		3.57507	2.43142	3.32922	3.2717		10.2228			1.7403			1.35772		1.55762	1.51054	1.50086	1.7315	1.4832	1.5784	1.2221	1.20276	1.51756	1.44474	1.7028	1.6935	1.65444	1.6846	1.47188	1.51606	1.55982
Jubao Lake	35.62	86.27						1.4316	1.88516	11.8115			3.46374								1.49338	1.306	1.2981	1.33268	1.22678	1.1347	1.36692	1.59997	2.22104	2.02386	2.2228	1.82258	1.91492	1.6806	2.05414	1.80344	1.38824
Shengli Lake	35.29	86.27							10.4229							8.9356		0.90732	2.07198		1.62706	1.35472	1.75094	1.60698	1.45838	2.09228	1.58394	1.18054	1.58736	1.14602	1.73176	1.53478	1.38816	1.5699	1.56296	1.61534	1.5564
Woniu Lake	35.73	85.27						2.05347		4.94415	3.19185		3.0561		2.2832			4.53052			1.9495	4.91165	1.2398	1.02743	1.1954	4.41895	2.61875	1.8221	2.56486	1.95654	1.5511	2.1225	2.27242	1.94686	1.71628	1.72932	1.91326
Shiman Lake	36.25	86.11						3.0961	2.02792	8.13602			10.7135								1.20036		1.47066	1.77826	1.81294	3.50154	0.934	1.2318	1.96837	1.74646	2.50634	1.2839	1.6237	2.01052	1.42652	1.8753	1.51666
Cuochuolong	29.12	85.4			6.97708	1.06713	6.72466		4.40455	5.59664	5.22904	3.54614	3.2861	4.60628	2.58756	3.64238	2.51607	3.3836			4.71474	4.93214	4.75604	5.52942	3.07424	1.48196	3.31458	2.4514	4.00433	6.60532	11.0378	4.519	3.31704	2.67382	2.12742	2.16876	2.9057
Damazirang	30.95	85.99			3.67508	3.02782	2.9505	0.948933	2.01026	2.7483	9.27836	3.91274	5.24645	2.33283	3.35924	6.41408	3.30055	3.7772			2.19826	2.01068	1.70208	1.18804	1.90926	1.40422	2.04952	1.39258	2.77934	2.42364	3.3488	4.75103	2.22122	1.71788	1.45344	1.7459	2.18526
Pozi Co	30.47	86.11			4.0024	0.962867	0.983025		3.65373	3.63867	1.1202	0.9801	0.5531	2.2655	0.881225	8.3545	1.16778	0.67612			0.96668	0.88332	0.73348	0.863567	0.74716	0.7739	0.94974	0.91846	0.71332	8.27896	1.23848	1.27196	1.32868	1.3097	1.29806	1.2816	1.42626
Jiaruo Co	32.19	86.6																			2.28826	11.0021	9.22512		3.40736	4.04738	5.85258	2.53062	3.23774	2.68366	3.36116	4.10134	1.41088	1.20218	2.0752	2.8036	2.58428
Wuga Co	32	86.64			1.74897					2.94277	4.62215		2.16212		6.35217			2.44663			8.60382	4.3556	2.09458		2.34917	3.63284	4.23593	1.73938	2.75998	3.08998	2.62968	3.3319	2.60896	2.1477	3.29566	8.95198	2.3508
Xiabie Co	32.22	87.27			0.84782	0.9233	0.452	0.94876	1.00813	0.228767	0.185		0.23715	0.2115	5.26115			1.5721			1.2391	1.0863	0.2404	0.8246	0.420667	0.98526	0.2554	1.1531	1.05952	1.1925	7.2293	0.862575	1.373	1.34543	1.31482	1.29962	1.20267
Tari Co	31.52	85.68			3.0031	1.88207	3.64288	4.4828	5.9475	3.83572	3.23834		3.36722	3.22682	3.5291			2.0639			3.03926	3.76328	7.20136		3.278	5.3817	2.69652	2.96304	1.96242	2.64632	2.23314	2.6587	2.0585	2.69538	2.32518	2.69094	3.12934
Caiji Co	31.21	85.44			0.741667	0.984067	1.8522	2.66122	2.17286	2.01917	4.2213	0.350833	2.7764	3.85463	6.94824	0.7689	4.56064	1.7105			1.97847	3.31123	3.36933	1.76327	1.8035	1.16493	2.62297	1.23537	1.29012	1.87534	1.835	1.38334	3.75986	2.0313	2.02288	2.13684	2.23416
Duolangcuoguo	32.23	85.86				5.94912	1.54187	2.15942	1.98868	4.1614	5.45894		8.87756	2.93357	6.0501			1.34388			1.46522	2.05816	1.34234		1.04792	1.92572	1.7623	1.39398	2.55916	4.1793	2.8367	6.7486	2.71758	3.86552	4.57193	3.42953	3.45687
Qige Co	31.2	85.53			4.1806	4.7864	4.58952	3.3602	4.05246	2.72935	3.38856	4.86568	3.4232	3.90628	3.68832	5.55898	4.77694	3.73174			3.42116	4.9612	4.8457	5.1441	1.89037	5.3387	3.43034	3.43732	4.47755	4.88188	7.47715	4.03358	3.97026	4.08006	4.31594	9.94506	5.82008
Yongqin Co	32.36	87.06			4.34562	2.47186	4.52812	2.30002	3.4752	2.32834	1.61954	3.51754	3.516	2.09928	1.89102			7.05654			2.35215	2.53582	4.7003	4.04668	3.0252	2.73785	4.17544	1.7323	2.6783	2.93656	2.66444	3.10388	3.31422	3.21352	3.43708	2.8279	3.02914
Ziru Co	32.17	86.19			1.08183	5.37405	1.90867	7.7995	2.23296	2.87548	1.86768		6.63022	3.6743	9.69674			2.4415			2.3344	2.53656	1.75196		2.27874	1.66078	3.49466	1.91228	1.84644	2.52448	1.92104	2.61458	2.40712	2.20512	1.96164	1.77724	1.5447
Tongmo Co	32.3	86.57			0.5726	2.1937	1.80422	2.43418	1.54632	1.9465	2.21972		2.63562	2.04134	1.85796			2.75642			3.6229	5.35534	6.20272		3.39722	0.53625	2.54038	2.58792	2.4487	2.78642	3.35468	6.29525	3.4694	2.3675	2.35058	2.84728	2.3039
Kangruchaka	33.56	86.96					6.13912	6.7799	5.11986	5.37614	10.9812		6.9774	4.30704	5.47276						2.06444		2.08903	2.86464	1.82096	3.26028	1.74667	2.79338	2.37736	1.70754	3.38642	4.58025	2.76885	1.60082	0.9687	1.59932	4.0934
Gangtang Co	33.2	86.67				9.36768	4.80844	3.14343	3.63223	0.93242	1.93124		1.73032	2.33682	1.68404			1.72017			1.57004		2.08966	3.0279	1.51846	0.41002	3.55982	2.25422	2.58102	1.57826	3.99418	2.43516	4.07166	2.33258	2.68324	3.8487	3.88842
JiaomuChaka	33.27	87.21				4.79777		2.8342	3.7235	3.44475	3.99687		2.09788	2.83033	4.51847								4.69587	1.86084	1.5914	4.7514	4.66154	3.3483	2.38218	2.33292	1.90046	4.52407	2.20188	1.96972	2.43388	3.39168	2.80612
RejueChaka	33.69	86.84				9.89938	5.09802	8.06618	9.43338	6.98612	4.22		5.96765	5.54124	5.4616			2.58886					1.12324	1.09734	1.0367	1.13667	0.87138	1.16978	1.97798	1.99064	1.75984	2.3898	2.209	2.26522	1.93538	1.96978	2.07266
Beiyu Lake	33.03	86.17																					3.40092	3.52663	5.013	3.01907	4.83083	4.80817	1.58122	1.9417	6.67744	10.4166	5.91174	2.19188	1.07192	1.29942	1.19588
Riganpei Co	32.58	86.24			3.99913	0.60155		0.6239	8.19484	1.1479	1.41985		2.0252	1.0523	1.93295			0.96665			0.8901	5.90536	0.4	0.6928	1.4246	0.5116	1.6636	1.8532	1.67842	2.46638	2.04858	2.0717	2.2178	1.7634	1.9961	1.61724	1.55852
Zishi Co	32.73	86.98					2.9591			1.99098	3.7726		2.02014	2.80158	2.56677			1.94862			2.43114		8.31074	11.3306	2.9321	2.23858	2.3571	1.06712	2.0352	2.03084	1.89604	2.32752	2.29924	2.11438	1.63814	1.22992	1.18908
Bensong Co	33.21	86.43				10.0664		7.7494	6.68522	8.15664	9.39486		9.69882	9.45298	7.22192						2.29268		1.82944	2.87182	1.8555	1.0379	1.8591	1.48786	1.78206	1.66874	1.84034	2.59286	2.09574	2.237	2.04848	3.24318	2.75046
Suona Lake	33.92	86.69				3.2026	5.24268	3.0126	0.306533	2.24282	1.15885		4.37876	2.14056	1.7814	4.97413	3.18047	2.05475	2.76262	2.40676	0.86604	1.1332	1.02985	4.70646	5.65608	1.30662	4.42572	2.58298	5.27036	5.20404	4.34116	2.4907	1.70822	2.75248	4.85286	5.15917	5.6375
Danshui Lake	34.71	86.4				9.3778	1.32812	1.57287	1.842	1.72992	1.79732		3.12424	1.20206	1.82136	1.50555	1.80146	7.24837	2.82476	4.0312	1.31362		1.18948	2.3124	1.3117	1.09298	1.5528	2.64494	2.5766	1.48678	1.9584	3.17116	3.01386	2.86096	2.5007	2.99602	3.20548
Shuixiang Lake	36.03	87.88				4.1423		2.14522		2.44676	5.29444	7.88652	7.1211	2.03988	2.63777	1.83482	1.78188	2.10928	1.9685	1.97958			2.87466	1.63712	3.7332	1.54236	2.36003	2.82862	4.5129	2.64518	2.21702	1.72966	2.37826	2.18098	2.0884	2.34632	2.3011
Angrenjin Co	29.31	87.19			2.31013		2.67836		1.29992	1.74786	2.10146	2.15336	2.1755	1.91392	3.8222	2.89954	2.67715	1.36402			2.2274	2.4401	2.48482	1.25496	2.2314	2.40376	1.63423	1.81512	2.9394	2.74862	1.87236	2.49787	2.59767	3.881	4.07323	5.15428	11.2216
Cuowomo	29.8	86.94					1.4886		5.76915	4.52793	0.6556	4.2194	2.78383	1.57416	2.80184	2.56155					2.2105	5.03488	0.854667	0.9451	1.37643	4.94482	0.8181	2.2419	1.5534	1.34893	2.96817	2.03574	5.223	2.17623	3.11412	9.2376	7.82924
Dongguo Co	31.72	86.98			2.58777	4.43013	3.49362	0.9097	6.5957	2.5782	1.63268	3.2431	2.41226	4.96552	5.9608					1.03183	1.29657	1.77897	5.94703	0.727967	1.78813	1.39527	1.32813	3.05992	1.99048	5.81536	2.28093	2.81864	11.1239	8.92892	2.09494	2.0849	2.44683
Puxu Co	31.91	87.21						4.67298	3.54778			4.32617	5.2602	3.61483	5.48662			1.84323			2.30484	2.6487	3.22314	3.34274	2.5314	2.56546	2.72866	2.7325	5.2024	7.5894	3.8879	3.60232	2.572	2.64916	2.02898	2.79018	2.15816
Chaxiabu Co	31.93	87.88							1.88934	4.96777	4.54113		5.90402	10.4593							1.03634		1.35896	1.1434	1.5987	1.6462	3.21674	1.30114	1.7391	1.57648	2.61074	3.62564	2.90868	3.98404	3.14914	2.67104	1.44624
Dongbu Co	31.31	87.23			3.56874	3.03342	2.37284	5.39138	6.78096	1.93833	2.2985	8.50874	4.90102	4.05524	2.27653			0.874333			0.980767	1.21877	0.801975	1.14544	2.18602	1.86275	2.78545	1.05242	2.18252	2.13736	1.78256	2.39576	2.46672	2.52038	2.48106	2.13896	2.08314
Niudu Lake	33.65	88.58													2.71387						1.7168		1.68882	2.09466	1.45774	1.26946	2.50572	2.12988	2.02356	3.59842	2.181	2.19002	1.8418	1.18794	2.53532	3.08726	2.4353
Luxiong Co	32.7	88.54								0.546533			2.77027	0.5461							1.11508		1.0806	1.14636	1.15646	8.55394	0.98832	1.16932	1.2941	1.30218	1.26712	1.25486	1.27884	1.26752	1.29626	1.27174	1.24186
Xiaochaka	33.07	87.77																			1.12485		4.78937	9.6664	1.38698	2.62073	1.76178	4.20685	2.16264	1.58076	1.78238	1.69576	2.47954	1.1842	2.66094	1.373	1.33854
Beileicuo	32.9	88.44							4.2347	5.03746	7.59156	5.50116	11.1495	7.68044							1.94804		1.36052	0.752575	1.69912	1.64034	1.62732	2.09908	1.23936	2.3425	1.74354	2.07864	2.67588	3.13346	1.81236	2.12716	1.49102
Ciyirure	32.61	87.21											4.72055	9.80656	3.25856						1.57614		1.2715	1.9306	1.90426	1.29566	1.45594	2.15092	2.13292	1.93088	2.28676	2.84138	3.02788	1.87212	1.66638	2.04818	2.34176
Yupan Lake	34.9	88.39						6.29178					6.16704	4.68147		5.4797	6.76482	4.68466	1.27946	1.47278	1.65494	1.51832	1.36766	1.33494	1.44824	1.26272	1.4548	1.79604	1.15798	1.2991	1.2637	1.41916	1.74932	1.99582	1.3742	1.68276	1.3116
Yongbo Lake	34.96	89.23				10.7903		5.83986					6.24416	4.865		5.80074	5.51824	5.28506	2.20838	2.80994	2.70226	2.75636	2.60142	2.71082	2.39318	1.85192	1.68698	1.601	1.52906	1.35146	1.37678	1.3449	1.25302	1.73042	1.68022	1.2161	1.26994
Zhuyang Lake	34.39	88.42											8.83068			4.29707	6.28892	5.2376	6.6099	6.1376	3.8229	3.6571	1.51253	2.09448	1.32483	0.91045	3.74582	2.10228	1.25964	1.36114	1.48024	1.18626	1.39624	1.10364	1.6427	1.1913	2.9644
Yinlong Lake	33.91	88.04			10.2249	2.17315		2.02973	1.60098	3.98997			4.5495	3.49064	1.81642	2.32513	2.2001	2.2184	2.20783	2.303	1.4154	1.35294	1.44705	1.55516	1.1822	0.946	1.0721	1.1802	1.68538	1.38592	1.88696	1.97614	2.15038	1.36204	0.81324	1.75956	1.82338
Xiangyang Lake	34	87.56						8.33982		6.16044	9.6729		4.28048		2.29467	1.56252	1.8714	2.12788	1.72658	1.6226	1.19338	1.67462	1.04382	1.55698	1.77952	2.22756	2.59594	1.80106	2.14916	2.636	4.46518	3.59076	2.1717	1.9499	2.04978	1.76644	2.06668
Pipa Lake	34.2	87.79								8.4369	5.21748		5.86308	2.408	2.87104	2.49815	1.5051	0.82418	1.21687	0.77168	2.15273	2.7707	1.0177	1.32308	1.33167	2.0279	4.6837	2.34983	3.11807	2.48376	3.45113	3.20852	4.21353	2.66695	3.91257	3.44627	3.70868
Huangshui Lake	34.33	87.7													9.73812	6.85986	2.72174	7.04717	1.58568	1.6214	1.62604	1.5987	1.53218	1.5587	1.42208	1.30746	1.52512	1.35742	1.37832	1.46522	1.43664	1.97264	1.28544	1.69036	1.65408	1.61146	1.18852
Baitan Lake	34.56	88.58						4.4675								4.93982	4.33776	5.8201	9.23038	1.4311	1.42522	1.52422	1.66468	1.3004	1.10334	1.45274	1.57862	2.02687	2.3645	1.94248	9.06462	2.83734	2.25086	2.60016	1.45582	1.77886	2.1338
Youyi Lake	34.46	88.74						11.3306					4.8441			2.48734	2.06532	2.26132	1.79906	1.95606	1.47548	1.7619	1.67956	1.7188	1.35216	1.14556	1.48816	1.57033	1.40616	2.12878	2.08378	1.80136	2.00346	1.6197	1.6023	2.012	1.83882
Hengliang Lake	34.88	89.05						3.8808	3.14527	1.78405	2.75177	4.7202	2.6912	3.4948		1.94122	1.8932	2.7835	1.72582	1.7396	2.33295	2.1778	3.93392	1.46727	4.20886	1.98872	4.97652	2.57584	1.91402	1.91472	2.80366	2.9337	2.6004	3.31445	2.42457	3.51668	2.1954
Maan Lake	35.23	89.51	1.18224	1.10168	0.58725	1.02634	1.0394		1.15194	1.19778	0.50892		1.21394	1.11788	1.26578	1.14782	1.24204	1.18976	1.1717	1.2284	1.2242	1.24108	1.23016	1.2365	1.20592	1.19588	1.21088	1.2052	1.261	1.25692	1.27158	1.26934	1.26804	1.26364	1.26658	1.25124	1.26998
Tao Lake	36.17	89.32	2.94215			9.44272		1.92997	2.09127	2.99257	5.2737		3.45377	4.4809	0.98325	3.79246	3.06528	2.25868	3.00934	1.75812	1.9754	0.8109	1.9997	2.21308	2.03902	0.610425	1.48298	1.9588	2.43142	2.62226	2.59426	1.96478	1.7562	1.98982	1.8859	1.81352	2.13674
Wuming Lake	36.18	89.15	3.2663			2.1358		2.6615	6.8936	3.8325	4.87524		2.155	3.63798	4.75578	3.4184	2.31828	2.50128	2.5376	1.86493	2.62404	1.43358	2.5557	1.81334	2.33916	1.71032	1.758	2.00188	2.52024	2.81506	4.3738	2.53158	3.27548	4.63294	2.19436	2.50756	2.23444
Hehua Lake	36.14	88.99	3.68146	3.6161		3.97446		2.89302	5.5531	4.04534	4.16544	2.78212	0.5622	2.32332	2.66798	2.59408	1.65332	2.75706	3.15288		3.4055	4.04906	1.92972	3.40236	2.42846	1.6794	1.72473	3.3148	2.83276	3.0372	4.20682	3.18262	3.10512	2.71564	2.79356	2.6404	3.19958
Cuomuzhelin	28.4	88.23			2.9123	2.26654	3.22487	4.27406	3.54555	2.24172	3.96758	5.91916	2.17078	2.6243	1.565	2.3215	1.5191	5.1093		3.73623	2.02186	2.63776	3.43802	1.71445	1.65846	1.4665	2.13533	1.9338	2.74188	2.70224	2.16044	5.64134	3.53384	3.21038	3.16644	3.8233	3.68794
Kong Co	30.82	88.35			5.59076	2.43462	3.4935	5.6081	4.00907	5.65135	4.55836	4.47824	6.10658	6.84798	3.40358	7.407				4.04384	4.78964	5.48608	5.74504	4.1034	3.59945	3.69235	2.73763	5.94312	2.4071	3.30376	3.55028	3.96742	3.3274	1.26802	3.52912	3.4671	3.61164
Chazang Co	30.23	88.58			5.40038	2.92163	3.55758	5.71015	3.26013	7.0136	5.32652		2.82275	8.2965	3.81657						5.06938	4.66932	6.1545	3.50566	3.95237	6.7881	5.84932	0.625033	5.03846	5.25154	5.16098	4.49274	4.87465	2.20606	1.3958	3.22026	4.06426
Mudidalayu Co	30.58	88.59				2.5394	3.72483	1.15438	7.25845	5.5806	2.31314	8.50264	2.5662	1.34715	2.38397						3.06075	0.992725	2.80587	1.29443	2.29707	0.552267	1.53858	2.34256	2.78444	2.81704	3.31318	3.50646	3.78064	3.5083	2.6677	3.47566	3.39442
Baosai'er Co	32.34	89.45			4.217	11.2616	9.52694	2.25812	0.99195	6.137	1.69796	4.64168	3.48856	3.02513	2.71086						2.1841	1.68348	1.93336	2.60948	5.35186	4.02017	2.7929	3.14993	2.18878	2.07616	2.06688	2.87228	4.3519	4.82286	2.456	2.21206	2.41082
Zanzong Co	32.24	89.61			6.32452	5.23502		5.00998	4.24914	6.41734	6.07044	5.76848	9.45198	6.5815	1.19698						2.16698	2.05406	1.19294	1.9113	1.91452	1.88824	1.83614	1.67522	2.04678	1.8296	2.25166	4.48868	2.59276	3.11062	2.20672	2.24998	1.92336
Bengze Co	32.08	88.67			3.71228	4.55606	4.8709	2.9695	3.00854	3.1272	3.63064	3.48442	3.9475	4.0194	2.8601						3.1427	3.46782	4.02845	3.68355	3.71712	3.7341	4.34925	9.74646	3.58692	3.04344	2.82837	4.34818	3.1258	3.57678	2.88082	3.18526	2.50223
Ga'a Co	32.21	88.96			7.30458	1.23272	11.6672	8.73054	1.74153	8.57574	1.3428	1.0741	1.44457	0.935425	1.6987						5.15614	2.5846	1.13725	6.24372	2.6984	4.1317	8.95146	4.50366	1.4667	1.5141	1.8361	1.64284	1.39172	5.1094	1.27346	2.00696	1.95794
Namka Co	31.86	89.79			4.63756	9.12418	7.23978	2.12004	2.0199	2.84807	8.28396	8.73528	2.69128	2.72947	2.4673						1.45966	1.06044	1.10088	0.760333	2.6693	1.4003	3.03798	3.37568	3.1189	3.5341	3.19178	3.4729	3.31858	2.95198	2.25906	2.50372	2.775
Pa Co	31.91	90.04	4.51708		5.60952	4.53914	3.17938	3.88247	4.24977	3.32797	4.35853	7.4218	5.06008	5.4824	4.95536						1.4973	1.8698	1.47014	1.17812	1.51436	1.1325	1.77674	1.62124	1.72514	6.16448	5.78592	5.65014	8.83582	2.87696	2.46238	2.3951	2.24874
Puga Co	31.11	89.55			2.84122	2.5421	0.98928	4.95566	2.9487	1.9342	2.21823	3.1209	1.81294	6.79998	5.99048						1.09044	2.13152	2.6687	1.52424	4.68424	3.37808	0.4901	2.80242	2.1697	3.255	2.85038	1.44624	3.04492	2.88564	2.55524	2.96976	2.9098
Zhamucomaqiong	33.15	89.7			4.99516	4.5891	3.61098	3.90204	3.91582	6.2897		6.42382	3.6373		4.17005		3.7989		2.36466	2.55906	2.40174	2.77674	2.14964	2.13524	2.45574	2.30582	2.13584	1.98142	2.01184	2.02528	2.29664	2.69746	2.88292	2.54662	2.28496	2.62796	2.38224
Biluo Co	32.9	88.84			6.94015	7.99182		6.7794	2.48873				8.788		10.4335			4.34444	3.00536	2.60684	2.77116	2.71128	2.82162	2.44052	1.95018	2.49846	2.3778	2.19806	1.78596	2.46138	2.03484	2.57002	2.86	2.27928	2.19728	2.45712	2.13058
Ezong Co	32.86	89.46		4.94156	2.16582	1.69625	4.89783	1.9998	5.70513	6.89054	8.96946	3.97395	8.7278	4.41606	5.94658		2.56488		2.37038	1.78232	2.56136	1.79996	1.64834	1.91722	1.42796	1.44208	1.9309	1.59138	1.28324	1.4271	1.20124	1.21082	1.4446	1.69572		1.71502	1.49238
Deru Co	32.69	88.88			5.92946			5.39462	3.44716	2.26128	5.26137	4.45654	5.14007	4.9044			5.8733	0.78582	6.1412	1.97218	2.1637	2.267	1.94942	2.2879	2.59014	1.73308	2.62294	3.16702	2.28574	2.49272	2.16214	1.95942	2.8071	3.24638	1.93062	1.42664	1.20768
Yangnapeng Co	32.33	89.77			9.77208	2.00598	2.3883	0.8555	1.58513	4.73504	2.19842	1.58722	2.08422	1.47066	1.0713		2.51922				1.03992	3.1839	3.5294	4.90754	1.4686	2.67772	1.48345	1.29322	1.87294	2.20125	2.20296	1.9234	5.11505	3.67274	1.37816	2.38882	1.94624
Riju Co	33.8	90.36	2.36502	2.55347	5.41966	1.78238	1.63328	1.61168	1.17348	2.53598	1.95766	1.18082	1.83644		1.89296	0.2572		2.36902	1.68268	1.73284	1.34898	1.3582	1.60756	2.1	2.27648	1.52848	1.54428	1.70153	2.42264	2.4484	2.0865	1.89668	11.3306	2.59292	1.10065	4.64228	2.8685
Yanzi Lake	33.87	89.93	2.05264	2.41152	5.15678	3.98897	2.49268	2.8376	1.6186		2.52397	1.44515	2.74187		2.5126	2.68313	1.28787	2.4571	4.52026	2.71596	1.62652	0.8116	1.33924	2.38342	1.70258	1.02348	2.56882	5.54467	1.98276	2.87586	2.458	2.14167	1.93902	3.7794	8.26458	3.14962	2.19516
Jieyue Lake	35.07	90.27		2.9038	2.76448	3.9156	2.09052	7.80434	4.40334	1.98826	3.3092		2.0404		2.9947	1.59416	2.13304	2.18824	2.20633	2.74246	2.2615	1.8531	2.40118	11.2733	2.35714	2.69905	3.897	2.3631	3.34323		3.67644	3.44068	3.40874	2.53718	4.19548	3.22554	3.16488
Dongyue Lake	34.38	89.21		1.02086	0.98565	1.19678	1.38137	1.0603	1.05525	2.31487	5.54346	10.6573	9.3905		1.76807	1.00794	1.25923	1.5535	1.60928	2.7172	0.9707	1.15065	1.5532	1.8266	2.2808	2.3389	1.63067	1.9107	2.35704	1.9468	2.96505	3.05094	1.70918	2.99474	2.0479	2.18556	2.05366
Ganju Lake	34.23	89.51				4.26965	4.2721	3.18524	5.2211	5.8169	3.5085		5.02786			2.98996	1.8805	1.76933	1.877	2.01324	2.27774	4.05034	1.43883	3.1123	1.58772	1.84173	1.9383	2.62263	1.5713	2.54252	2.71426	2.81682	2.77238	2.18876	2.18568	2.85236	2.72056
Wuming Lake	34.21	89.75				3.64105		7.7747	2.22223	4.5248			6.68574			8.00572		2.39222	1.89762	1.31012	1.4809	1.57876	1.8385	2.50212	2.08442	1.76998	1.4944	1.53866	1.9636		2.03608	2.21418	2.10738	2.01286		2.44858	1.92738
Cuoou Lake	33.81	90.52		1.61988	3.21448	2.8341	2.73603	5.3065	4.51805	6.11432	4.8933	2.4627	2.02156		1.1852	5.37533		1.69794	1.94405	3.45835	0.9749	8.24884	2.00917	1.16594	6.40558	4.02575	1.3849	3.15983	2.27014	3.56636	2.2759	2.58966	2.2973	2.58	2.07302	2.63462	2.7439
Taiping Lake	34.3	89.71	1.88407	3.3679	4.219	5.4018	4.4378	4.96988	5.7379	8.22494	7.01422	8.64265	6.68522		4.58977	3.2632	0.651167	3.30762	9.65412	2.4287	1.7948	2.28996	1.16586	2.01976	2.19152	2.41446	1.30634	1.09013	3.24588	2.59122	4.36827	3.2583	2.30116	1.56102	1.20768	1.86446	1.80052
Rumucheng Co	33.74	90.64	3.7587	9.79106	0.55995	2.1552	0.8298	6.4477	4.5223	4.75162	5.5247	5.37596	4.97792		5.08682	9.5119	3.94738	2.40987	1.87028	1.28122	2.24296	5.12746	3.62882	3.25452	2.23932	6.27918	1.87377	3.1732	3.30056	3.428	3.56304	2.1526	3.21966	3.42842	2.48442	3.82022	3.68386
Yuan Lake	34.81	89.29				8.74334	7.23998	5.04042	5.92464	1.74178				5.90005		2.82166	2.55534	2.43856	2.42172	1.80838	1.62598	1.45608	1.66776	1.8269	1.41254	1.1772	1.27792	1.52046	2.44954	2.09614	1.999	2.50508	2.16706	1.98918	2.01958	2.30226	2.46522
Gaotai Lake	35.41	90.96	3.95085	1.85722	1.1901	1.2299	3.112	1.93574	3.90612	1.89095	3.1588	1.65033	1.47357		4.92884		1.91208	1.71676	2.7428	2.44167	1.78238	7.92108	2.44674	1.97178	1.0391	1.53867	9.47932	2.07567	2.66857	3.53563	2.9883	2.14242				2.9225	2.9675
Kushuihuan	35.99	90.12			7.14692	8.64766	3.36077	4.39588	3.16467	4.82307	4.28092	3.30733	5.36986	5.6087	2.50835	4.77873	3.43425	4.59967	5.77443	4.13377	5.37712	2.95896	3.29526	3.34356	2.60908	2.84238	3.69574	3.11918	3.44056	4.11486	4.15076	4.11138	2.66173	3.42676	1.18634	3.6175	3.26903
Bolakelaleli	36.37	90.7		2.81675	1.37477	1.53715	1.89795	4.93925	4.6333	1.3342	3.60074	4.30832	2.11262	1.82985	3.59678	1.5771	2.00335	4.72982	3.65135	3.7266	1.69837		2.43693	2.0376	4.83397	5.1627	6.43367	5.42875	2.07086	2.108	2.73092	2.01036	2.3646	5.97223	1.16575	1.78686	2.7958
Wuming Lake	35.95	90.83		2.10026	1.98562	2.22024	2.67775	8.43276	2.04204	2.60306	11.3409		3.0537	3.0056	2.94964	3.12414	2.08613	2.45657	5.46586	1.7375	3.26548	3.10167	3.46988	2.9721	3.15004	2.60858	2.5767	2.1582	2.7312	2.8808	2.80774	6.20876	3.8832			2.92924	2.47298
Jiuru Co	31	89.92			1.7514	2.93757	2.92408	7.3072	3.23225	2.042	2.02217	3.16872	1.4804		1.57623		4.92093				3.72394	1.9461	4.8444	1.49763	2.42667	1.1678	5.06198	9.79242	1.62586	2.94542	2.69344	2.86694	2.95708	2.6034	3.0167	3.41312	3.1019
Jiangchai Co	32.16	90.46	3.2743	2.33248	9.47298	2.86344	3.38496	2.12574	4.40745	6.52848	2.24347	1.50108	2.59413	1.9457	1.98503						4.1141	1.6032	2.67288	9.45268	2.56752	3.73628	1.0629	3.10656	1.19906	2.94602	2.9774	2.81662	4.09842	1.712	2.5179	2.13756	2.22482
Xuguo Co	31.95	90.34	1.83205	2.0269	1.49478	10.0967	1.49553	3.0509	4.73555	5.04604	1.63287	2.34643	1.7618	2.23307	4.0226						1.27385	1.5427	0.390533	1.53287	0.908533	1.07337	0.6405	2.27115	1.513	1.8658	1.80362	1.73996	1.66802	2.15065	1.60302	1.94548	1.9423
Jiang Co	31.55	90.82	4.92464	7.16842	2.68348	5.65367	3.2096	2.94175	3.3325	2.7464	2.68562	1.7556	1.87732	3.36045	2.13072			4.82136			1.46342	1.7077	1.38656	3.30715	4.06658	4.748	2.9297	2.7691	3.14444	3.46444	3.1622	2.81168	2.97775	2.56942	2.51152	2.50204	2.61692
Qieli Co	31.68	90.97	1.40013	4.52058	6.03296	6.00305	1.83608	2.0935	0.8445	1.9028	2.05345	4.84218	5.53278	3.09782	1.27265						1.07318	0.94308	3.07103	0.690933	1.5067	0.66194	1.42863	0.9985	1.35402	2.152	2.60453	2.28943	2.63017	4.53022	5.97977	3.49918	2.81553
Chari Co	34.42	92.27	7.51798			4.40914	5.51348	5.14788	4.5529	5.57882			4.979	5.1609	3.94017		5.33382	4.03106	3.88028	4.62218	4.05866	4.77136	5.10276	3.14688	2.11316	3.39954	3.55966	3.5315	3.00552	2.78352	3.25992	3.50034	4.01198	3.6689	3.68116	3.2192	2.37738
Goulu Co	34.6	92.45			0.65125	1.29408	1.32968	7.74737	1.25742	1.33322		0.4309	1.05606		0.8554		0.8513	1.31126	1.27464	1.27548	1.32104	1.28188	1.2941	1.30588	1.31322	1.24198	1.2539	1.21908	1.20734	1.22756	1.2117	1.2129	1.24636	1.23096	1.21864	1.22552	1.24
Wandou Lake	34.56	90.85	0.5866	0.87355	1.88184	0.907533	1.3474	1.962	2.91457	1.14945	1.67678	0.7054	1.81627	3.4525	2.32217	3.24414	0.927067	3.01377	3.342	1.79773	2.37747	2.7013	2.10487	1.0071	1.47947	1.18768	1.33947	4.3364	1.84134	1.3879	2.00684	1.99466	1.91168	2.93075	1.83316	1.78472	5.89888
Bong Co	31.22	91.16	2.5665		3.07094	9.30792	3.31107	10.7017	3.89243	7.7667	3.28238	3.30225	2.69016	1.27347	2.66402						6.9958	2.05127	2.1178	8.76882	3.00385	3.33308	2.16422	4.52097	2.55022	3.31788	3.77328	3.61214	3.43824	1.41642	3.29214	3.60992	3.22774
Zhuonai Lake	35.56	91.95	0.4089		1.26947	2.15983	5.6165	2.3362	1.49523	1.797	1.51067	1.3189	1.76233	2.92055	1.94135		2.13463	2.3291	3.81882	1.6646	1.1258	0.991125	1.85747	2.33423	5.47443	1.5505	1.31676	1.0469	2.16155	1.5923	2.24806	3.09785	8.79777	1.88984	1.7785	1.8297	2.02222
Yueqia Co	30.47	88.61			5.8404	6.44644	1.59248	6.21242	5.9627	7.28662	2.55898		4.87326	2.1882	2.90948						1.7784	2.30554	1.8054	1.9175	1.37635	2.5839	1.3554	0.828167	3.3176	2.36964	2.3456	2.86242	2.53776	2.29286	3.23344	3.26576	2.2873
Guogen Co	32.4	89.19			3.0218	4.15883	8.6199	2.97845	2.64717	1.56282	2.46006	5.61138	10.3803	4.2026	1.77682						1.20768	1.84892	1.6916	1.63568	1.54014	1.32238	1.51054	1.54294	3.71367	1.94852	2.10808	2.037	2.45098	3.3426	2.39206	2.77097	2.91943
Mujiu Co	31.05	89			1.1994	3.1878	2.1082	2.43542	4.57895	0.7817	4.09357	1.46315	0.974767	2.6669	6.23232						1.20547	0.65305	3.5071	1.13762	1.25903	2.32898	0.62035	1.7273	3.99938	2.2225	4.56422	3.81956	3.16434	2.01474	1.5096	3.2319	3.30472
Laorite Co	33.73	90.01	0.88405	5.92362	5.9928	0.850033	0.5	6.47195	1.74232	2.17714	2.76694	2.12935	4.83092		2.097				11.3119	6.4358	1.41222	1.39658	3.0926	3.23012	2.26367	1.56405	2.1481	0.713825	1.93132	2.53466	4.34527	3.461	2.64974	4.71257	2.10084	2.9527	2.54402
Xuelian Lake	34.09	90.26		3.63122	0.750133	1.29468	1.77422	3.27602	2.2534	1.65067	0.889167	4.06343	2.0004			7.23246		0.9639	2.33167	1.32147	0.856933	1.79035	1.73455	1.67125	3.3907	0.292833	0.9383	5.06038	1.66384	2.08968	0.50815	2.05798	0.5253	0.754375	1.4785	1.56172	1.96088
Botao Lake	34.01	89.95	1.01508	0.865675	1.97042	2.4671	1.48858	3.34422	2.36177	1.9495	2.77125	9.3101	5.24097		3.04537	3.25335	1.22467	2.7324	8.94664	5.81124	1.5237	3.83346	2.3879	4.26858	1.5977	3.41673	1.24063	4.95786	2.4247	2.51054	2.4358	2.84072	3.2229	2.5108	2.9636	3.72662	2.57242
Taiyang Lake	35.93	90.63		0.3362	1.3828	1.25778	0.90558	0.8716		1.08135	1.428	1.2684	2.2226	2.6701	2.15318		1.27595	0.9242	4.84858	1.4197	1.68238	0.8034	1.0469	1.39515	1.1699	0.8453	3.15905	0.95438	2.06086	2.05322	2.03058	2.007	1.94664	1.8086		2.0379	2.07268
Yinma Lake	35.6	90.62	2.7327	3.67582	8.3691	3.60472	3.34826	7.00502	5.0329	4.24006	10.5146	2.87124	1.9124	1.8665	3.64914		3.4885		2.37477	6.78814	1.83404	10.1536	6.03584	1.49442	1.90192	5.36702	1.97063	1.64567	1.38034	1.34402	2.92442	3.03808	3.04272	2.4825	2.09056	3.36106	2.8092
Gasikuse Lake	38.12	90.79	6.3772			2.5846	9.8074	5.07588	4.01397	5.05724	7.95068	7.75858	2.354	2.70575	6.5998	4.28873	5.326	2.59275	1.97295	4.5214	4.18414	6.50598	4.46742	7.79204	10.0913	6.20264	5.02302	4.10242	2.97498	4.16122	1.8462	2.15934	1.99354	2.3683	0.84874	1.19468	1.3011
Jiarebu Co	32.2	87.78				1.97582	6.9726		4.94296	1.3563	1.32912	2.38757	2.03205	2.99284							1.82598		3.79614	2.72693	4.72602	1.0385	9.23182	2.20684	2.81442	3.20516	2.93214	4.24662	2.86568	0.66385	2.31224	2.52656	2.55748
Najiang Co	32.32	88.69			1.94878	1.88848	2.17586	2.46568	2.00828	1.932	1.81926	1.98834	2.15896	2.12302	2.08752						2.13898	2.8383	5.72794	4.83023	3.52678	1.88518	2.29314	2.56014	4.20836	9.38932	6.7489	4.32076	3.80368	2.7045	3.50056	5.96016	11.4339
Zhangnai Co	31.57	87.33			4.61388	3.11085	1.8868		4.3673	1.18155	1.57656	4.11608	1.46575	1.3866							2.9527	3.4083	2.46743	7.15582	1.3205	0.595533	7.97067	1.53505	2.85352	2.44694	2.0187	2.09338	2.7909	6.88945	2.00404	3.54628	2.63202
Wuru Co	31.71	88				5.79188	6.04026		3.85155	1.47887	5.96616	4.48266	0.53162	4.13838							1.86558	3.19615	2.3149	2.13442	1.44678	1.88767	2.90013	5.2802	2.59556	2.86686	2.25784	2.89796	2.89986	3.98275	2.54044	1.97992	1.61636
Tso Ngon	31.59	88.72			4.48962	3.1666	8.06078	7.40075	4.83628	2.37008	3.95487	1.1817	3.93304	2.7539	5.36702						4.2713	2.7252	0.627233	3.73116	2.6452	5.63932	6.05284	5.6487	3.08276	3.07564	3.64208	3.31452	3.19752	2.86898	3.30774	3.32766	3.39056
Garen Co	31.16	88.28	4.51676	4.4812	4.20626	4.1916	4.94376	6.46705	9.78558	4.95246	5.31996	5.59583	4.7889	4.07755	5.20542	3.91523	5.27586	3.99292	3.62445	4.44383	4.2116	2.84013	3.66246	6.20327	4.30188	4.12824	4.2985	7.40845	3.31448	3.31532	3.40142	3.52194	3.84154	3.37226	3.39188	3.45082	3.32286
Kongkongchaka	33.16	88.11			11.2897	8.7865					8.96654	7.80846	6.61514	6.07506							2.62555		1.55137	1.91496	1.84644	1.8683	2.03992	1.71552	1.95682	1.72752	2.33556	2.54496	2.2408	0.94348	1.50916	1.48434	1.30154
Qiagang Co	33.22	88.39							3.8879	4.1281	7.98908	10.176	10.1706	5.2823							1.872		4.04982	6.66962	2.68758	1.347	1.36114	6.69633	1.6713	1.69158	1.15246	1.74854	2.34774	2.4754	2.85106	2.7271	1.72524
Bandao Lake	34.17	88.44														5.42024	5.63932	4.78414	4.1977	1.19568	1.51984	1.1107	1.22794	1.24734	1.1957	1.22842	0.97576	1.1664	1.40228	1.5315	1.18228	1.54722	1.7589	1.4245	1.19928	1.26024	1.34984
Zhari Namco	30.93	85.61			4.7626	2.66343	2.35793	3.30167	4.3529	3.53188	3.16326	0.739267	3.49136	4.537	2.43113	4.78563	5.04294	4.50848			3.54198	2.59872	4.19636	3.62962	3.44592	2.73488	2.97036	2.2942	2.81484	2.45374	3.00958	2.50582	1.99458	2.605	2.47176	2.55792	3.04504
Maerguochaka	33.86	87.01													4.30508	2.68683	0.93215	0.287567	1.53554	1.1601	3.11233	1.2953	0.937175	1.70493	1.4086	0.91265	1.05135	1.18684	6.8447	3.80647	3.3181	2.40476	1.14256	1.1565	1.9146	4.9482	2.03352
Yagen Co	32.35	87.31			6.36805	6.28234	2.64766		6.30663	2.07735	2.17523	4.14292	3.10705	3.15608	4.91296						3.11857	2.01917	2.29585	5.95496	2.57797	1.77983	4.7933	2.76504	0.52335	2.09468	1.3279	2.1089	2.25942	2.28228	0.137	2.14968	2.1178
Chaoyang Lake	35.3	87.26													1.0042	0.58275	0.61895	1.2911	1.02937	1.2911	2.948	0.9232	0.65385	0.8488	0.3445	0.1829	1.59735	1.32425	4.22363	0.989367	0.9062	0.802333	1.11146	1.05265	1.43455	1.48398	0.9901
Ruola Co	35.01	88.05						4.064							5.05513	5.51515	3.39507	2.93855	1.9659	2.0793	1.64312	2.33934	2.95228	3.12725	5.07263	3.99497	5.8516	2.61056	3.28753	1.83704	2.91342	2.94228	1.54612	1.28262	1.2897	1.31824	1.2211
Garen Co	30.77	84.95			1.4			2.3	1.5	1.2262	1.67715		1.3429		1.068			0.7123			1.2783	1.7208	1.52115	1.0097	1.2229	1.10445	1.6267	1.55125	2.02144	1.90828	1.42098	2.1635	2.71742	2.20248	2.06376	1.85442	2.12644
Maiqiong Co	31.02	84.58			2.79458		3.13084	3.02982	2.918	0.6088	1.53748		1.6536	2.42798	2.33344			2.22214			2.68424	0.966925	3.18554	1.43534	1.4421	2.0204	4.17352	2.72706	6.4707	3.94734	3.03746	3.88187	5.74352	9.26024	3.74216	3.74858	5.29038
Zhabuyechaka	31.41	84.06				0.78424	0.529933	1.9092	2.81315	6.24977	5.85467		5.39918	5.11143	1.954			0.9671			0.83624	6.1774		1.38518	0.613125	2.53662	2.00273	3.63586	4.326	4.44267	4.81968	5.1015	3.4762	3.61325	3.86575	1.9411	1.6968
Aguo Co	30.98	82.24			2.62443	5.0741			3.0972	5.1742	4.33688	2.10098	1.98696	3.32117	5.3657		2.75293				1.79804	6.7532		5.45392	3.71833	3.35345	2.99892	1.42882	3.61744	4.33816	3.62996	2.77206	3.46534	2.90094	2.78924	3.60356	2.6905
Wanquan Lake	34.24	83.81													1.3141			1.20768					2.01246	2.21578	2.16608	1.4056	1.04445	2.41756	4.3932	10.0358	8.00298	8.85812	7.59624	5.78024	4.26122	7.2473	8.63636
Tuoheping Co	34.18	83.15							0.909633	1.47247	1.87958		1.38195	1.4452	1.02178			1.21043					1.91742	4.38323	1.68517	1.87837	1.96762	3.26228	0.827475	3.09033	3.22223	4.5403	10.5006	2.20573	2.33642	2.01914	1.5753
Alu Co	33.99	82.39							6.61765	0.9897	1.43028		0.3568	1.28553	2.29836			1.84152						4.25482	2.90138	5.64645	3.44417	2.78603	3.519	2.34794	2.74322	2.92304	3.26302	3.78442	2.02336	3.57554	2.78086
Rebang Co	33.03	80.58								9.00278	7.96398		6.80343	5.78117	10.7245			2.8948							1.7175	2.66804	2.9605	2.85838	2.84855	3.55328	2.74073	2.66055	2.61698	2.51244	1.33778	1.29678	1.2669
Woerba Co	34.53	81.04								3.66925	5.81857		3.532	4.54012										5.09104	1.5948	1.61523	4.26582	4.01572	3.57908	2.02094	3.06276	2.88248	4.04086	3.97478	2.68026	3.3889	2.95253
Freshwater Lake	34.46	81.87							4.69143	0.9762	0.8769		1.42688	1.29758	1.17987									0.8092	7.51167	7.653	5.51093	1.585	1.33478	5.60592	1.6926	1.9334	2.16772	2.90387	1.63402	1.80888	1.71798
Donggeicuona	35.31	98.53	5.09117	3.29124	6.19046	4.05542	10.6127	4.0062	4.0374	2.25232	3.42165	1.71746	2.9911	4.80078	1.21192	4.4863	5.84142	3.5797	2.52024	3.75812	2.50902	1.90078	2.00333	1.6607	1.21134	3.24862	1.2983	2.9438	2.8975	2.9083	2.96982	2.63432	3.21462	2.61596	2.78738	2.72328	2.76942
Wuming Lake	36.98	90.74	2.82546	3.79276	1.68153	3.49412	2.20375	3.73906	7.67408	3.2814	2.89706	5.31876	4.32915	1.76657	2.6366	2.63614	3.0596	4.33062	2.0634	2.40953	1.80258		2.0248	2.0248	5.92896	2.18748	2.29888	1.94647	2.94068	2.7148	1.84974	3.42238	2.66324	3.19022	1.60544	2.6146	3.44064
Kumukuli	37.08	90.54	1.50962	2.17743	4.45895	1.49447	1.3731	2.12225		0.3712	5.65955	1.63948	1.90817	6.2374	1.28478	2.15783	2.16527	1.7127	1.91016	1.79627	3.50622	3.40092	2.04566	9.6132		2.01436	1.60023	1.79593	1.72515	3.14692	3.65334	2.8919	2.5479	3.32406	2.55706	3.19458	3.64322
Wuming Lake	37.3	90.31	5.1387	1.66328	5.19565	1.71675	3.19446	6.16647	8.80203	2.69615	2.38156	4.8685	1.6295	3.45028	2.50807	3.1267	4.46792	1.30917	4.3	2.054	4.3022	1.3267	1.8082	4.40442	4.52082	2.99923	6.36708	5.19178	2.80158	3.5472	2.20668	3.37622	3.20808	2.69842	2.26402	3.18212	3.0251
Beilekekule	36.7	89.04		5.7536		6.19362		4.29448	6.60412	2.55066			2.98286	7.3369	10.2754	3.70668	5.81122	4.0672	1.9826	1.9433	2.25672	2.42184	2.46102	1.169	2.5501	2.23298	2.0119	1.98646	2.5157	2.25774	2.31882	2.12104	1.99096	2.26192	1.86394	2.13626	2.1797
Dagadizha	32.87	87.12							3.84254				2.81628		5.8165			3.1131					6.07674	2.08524	1.97008	1.33184	2.02698	2.33554	2.52056	1.9542	1.63696	3.02824	2.48756	2.51226	1.82024	2.42052	2.42558
Quedan Co	34.37	87.49													8.70105	6.83012	2.21113		0.66674	1.28608	1.4131	1.40982	6.87627	2.13295	6.17244			1.8646	7.06548	9.8202		1.64712	1.12186	1.90498	1.63278	2.44756	2.43893
Xioakusai Lake	36.09	92.79	9.11032	8.82434	9.49788	8.1956	3.00915	5.78194	3.28212	3.25242	3.85054	8.695	7.9245	1.53772	2.73072	1.6599	1.67445	4.56188	5.0329	3.58538	1.63008	2.66732	0.2931	2.02404	2.41672	2.57734	1.72377	1.5873	2.09536	3.71482	2.4519	2.59334	2.4687	2.3915	2.2428	1.95428	2.12698
Nieer Co	32.28	82.21							3.0462	6.46958	7.0811		8.02868	6.00668	11.8585		4.7438	4.88572						4.21328	1.8532	2.44558	3.65376	3.04567	2.81228	3.05182	2.7154	3.4241	1.79384	1.59588	1.27027	1.3088	2.71358
Wuming Lake	35.98	82.86																					4.15958	11.0531	3.44965	5.31922	2.79084	1.44157	2.01585	3.00242	4.31636	2.42742	2.50504	2.3392	3.63096	0.49155	2.60736
Xinxing Lake	34.83	80.75								6.95785	4.29206		7.91908	7.8656	12.5061			2.5092						1.4497	1.80932	1.4455	1.4119	1.97382	2.15754	1.60836	1.99518	2.0642	2.16652	2.19184	1.87022	1.14518	1.23204
Ashikule	35.74	81.56								4.65625	4.925		4.67315	5.11592	5.2856			4.4221					4.63138	3.37652	3.52753	3.58995		4.10562	5.12235	12.7855	5.31573	2.9871	0.977	1.2611	1.60778	3.63132	1.0293
Heihai	35.99	93.26	7.6635	5.8588	2.26527	2.99365	1.53286	3.33455	6.3957	2.778	2.27833	2.71847	2.6327	2.56408	2.28922	3.17407	2.1302	2.00454	2.8709	2.31744	2.6687	2.66922	3.00897	2.03205	6.15105	9.23173	3.5218	3.05387	2.70712	4.18524	1.95202	2.1294	2.97625	2.1624	2.26722	2.09388	2.27574
Salt Lake	35.52	93.41	5.04455	7.17448	6.44976	2.6476	3.8362	5.542	4.50466	6.49895	4.8349	8.88568	6.83964	4.43066	5.40972	4.46532	4.4878	5	3.5325	3.99718	3.28352	4.7896	3.47477	3.45392	4.02525	4.83585	3.69324	2.79308	1.88134	1.4017	1.93472	1.694	2.2083	1.20768	1.67956	1.90186
Kongmu Co	29.01	90.45			2.05218	5.72838	2.98114	5.4944	4.5837	4.8066	3.50785	1.72428	3.91618		3.78312	4.86848	2.69462	1.76718			2.9483	3.3121	5.23594	4.23294	3.3875	2.15025	3.80348	4.51854	2.43714	3.34336	3.42574	3.3252	3.45106	2.95528	3.32584	3.43734	1.2286
Pumoyong Co	28.56	90.4			2.72086	2.65334	3.35062	6.8923	7.12718	6.51564	2.61434	3.45464	1.7976	1.5182	2.91108	3.79568	3.80258	1.84543			3.45695		3.89067	3.8347	7.22716	3.00872	3.1303	1.91826	3.04214	2.73088	3.24592	2.6439	3.09288	3.08278	2.91318	2.66384	2.61575
Zhaling Lake	34.93	97.26	1.72377	2.41123	2.489	3.76557	0.908367	5.81313	7.1261	3.8614	2.17923	0.828233	2.3779	2.19733	3.14517	1.3123	1.29377	2.784	1.92677	1.75147	3.53798	1.3654	4.16932	1.3977	6.83218	1.50763	9.77104	5.40028	3.27605	3.07748	5.86982	3.42367	2.84004	2.72977	2.06682	1.97762	2.2155
Eling Lake	34.9	97.7	4.0467	5.08422	2.28564	1.89926	1.0056	2.28247	5.3617	4.65666	0.74335	1.75576	1.72387	1.4957	2.54622	3.23825	1.48992	1.41965	3.23567	1.23805	3.93642	0.9103	2.28494	1.98102	7.09278	2.41467	2.9158	1.719	3.30558	3.15752	3.01968	2.6659	2.1808	2.21952	3.50212	2.52236	3.09326
Matou Lake	34.626	80.897								0.3808	4.5659		0.727467	8.74445										8.51988	2.99483	6.55255		4.81098	2.19236	3.25487	3.5559	0.92315	8.76287	2.02654	2.28872	2.01048	2.26192
